1 **Title:** The histone variant H2A.Z is required to establish normal patterns of H3K27 methylation  
2 in *Neurospora crassa*

3

4 Short Title: H2A.Z regulates H3K27 methylation via eed expression

5

6 **Authors:** Abigail J. Courtney<sup>1</sup>, Masayuki Kamei<sup>1</sup>, Aileen R. Ferraro<sup>1</sup>, Kexin Gai<sup>2</sup>, Qun He<sup>2</sup>,  
7 Shinji Honda<sup>3</sup>, Zachary A. Lewis<sup>1,4</sup>

8 **Institutional Affiliations:**

9 <sup>1</sup> Department of Microbiology, University of Georgia, Athens, GA, 30602

10 <sup>2</sup> State Key Laboratory of Agrobiotechnology, College of Biological Sciences, China

11 Agricultural University, Beijing 100193, China

12 <sup>3</sup> Division of Chromosome Biology, Faculty of Medical Sciences, University of Fukui, Fukui  
13 910-1193, Japan

14 <sup>4</sup> Corresponding Author: Zachary A. Lewis, University of Georgia, Athens, GA [zlewis@uga.edu](mailto:zlewis@uga.edu)

15 **Data Reference Numbers:** GSE146611

16

17 **Keywords** (up to five words or phrases): H2A.Z, EED, PRC2, H3K27 methylation

18

19

20

21

22

23

24 ABSTRACT

25 *Neurospora crassa* contains a minimal Polycomb repression system, which provides rich  
26 opportunities to explore Polycomb-mediated repression across eukaryotes and enables genetic  
27 studies that can be difficult in plant and animal systems. Polycomb Repressive Complex 2 is a  
28 multi-subunit complex that deposits mono-, di-, and tri-methyl groups on lysine 27 of histone  
29 H3, and tri-methyl H3K27 is a molecular marker of transcriptionally repressed facultative  
30 heterochromatin. In mouse embryonic stem cells and multiple plant species, H2A.Z has been  
31 found to be co-localized with H3K27 methylation. H2A.Z is required for normal H3K27  
32 methylation in these experimental systems, though the regulatory mechanisms are not well  
33 understood. We report here that *Neurospora crassa* mutants lacking H2A.Z or SWR-1, the ATP-  
34 dependent histone variant exchanger, exhibit a striking reduction in levels of H3K27  
35 methylation. RNA-sequencing revealed downregulation of *eed*, encoding a subunit of PRC2, in  
36 an *hH2Az* mutant compared to wild type and overexpression of EED in a  $\Delta hH2Az; \Delta eed$   
37 background restored most H3K27 methylation. Reduced *eed* expression leads to region-specific  
38 losses of H3K27 methylation suggesting that EED-dependent mechanisms are critical for normal  
39 H3K27 methylation at certain regions in the genome.

40

41

42

43

44

45

46

47 AUTHOR SUMMARY (150-200)

48 Eukaryotic DNA is packaged with histone proteins to form a DNA-protein complex  
49 called chromatin. Inside the nucleus, chromatin can be assembled into a variety of higher-order  
50 structures that profoundly impact gene expression. Polycomb Group proteins are important  
51 chromatin regulators that control assembly of a highly condensed form of chromatin. The  
52 functions of Polycomb Group proteins are critical for maintaining stable gene repression during  
53 development of multicellular organisms, and defects in Polycomb proteins are linked to disease.  
54 There is significant interest in elucidating the molecular mechanisms that regulate the activities  
55 of Polycomb Group proteins and the assembly of transcriptionally repressed chromatin domains.  
56 In this study, we used a model fungus to investigate the regulatory relationship between a histone  
57 variant, H2A.Z, and a conserved histone modifying enzyme complex, Polycomb Repressive  
58 Complex 2 (PRC2). We found that H2A.Z is required for normal expression of a PRC2  
59 component. Mutants that lack H2A.Z have defects in chromatin structure at some parts of the  
60 genome, but not others. Identification of PRC2-target domains that are differentially dependent  
61 on EED provides insights into the diverse mechanisms that regulate assembly and maintenance  
62 of facultative heterochromatin in a simple model system.

63

64

65 INTRODUCTION

66 In eukaryotes, DNA-dependent processes in the nucleus are regulated by chromatin-  
67 based mechanisms (1). One heavily studied group of proteins that are particularly important for  
68 maintaining stable gene repression are the Polycomb Group (PcG) proteins. In plants and animal  
69 cells, PcG proteins assemble into Polycomb Repressive Complexes 1 and 2 (PRC1 and PRC2),  
70 which play key roles in repression of developmental genes, as reviewed in (2-6). PRC2 is a  
71 multi-subunit complex that deposits mono-, di-, and tri-methyl groups on lysine 27 of histone  
72 H3, and tri-methyl H3K27 is a molecular marker of transcriptionally repressed facultative  
73 heterochromatin (7-10). PcG proteins are absent from the model yeasts, *Saccharomyces*  
74 *cerevisiae* and *Schizosaccharomyces pombe*, but core PRC2 components have been identified  
75 and characterized in several fungi, including *Neurospora crassa*, *Fusarium graminearum*,  
76 *Cryptococcus neoformans*, *Epichloë festucae*, and *Fusarium fujikoroï* (11-17). In these fungi,  
77 PRC2 is required for repression of key fungal genes suggesting that this enzyme complex is  
78 functionally conserved between fungi, plants, and animals (13, 14, 18).

79 In *N. crassa*, the catalytic subunit of PRC2 is SET-7, a protein with homology to  
80 EZH1/EZH2 in humans and curly leaf (CLF), medea (MEA), or swinger (SWN) in *Arabidopsis*  
81 (9, 10, 19-25). *N. crassa* EED and SUZ12 are respectively homologous to *Drosophila* Esc and  
82 su(z)12, human EED and SUZ12, and *Arabidopsis* fertilization independent endosperm (FIE; a  
83 homolog of EED), and SUZ12 homologs embryonic flower 2 (EMF2), vernalization 2 (VER2),  
84 or fertilization independent seed 2 (FIS2) (24, 26, 27). *N. crassa* CAC-3 (also called NPF) is an  
85 accessory subunit homologous to mammalian retinoblastoma binding protein 46/48  
86 (RBAP46/68) in humans, and multicopy suppressor of IRA1-5 (MSI1-5) in *Arabidopsis* (28-30).  
87 In contrast to PRC2, PRC1 components appear to be absent from the fungal kingdom (31).

88           The presence of a minimal Polycomb repressive system in well studied fungi such as *N.*  
89 *crassa* provides an opportunity to explore the diversity of Polycomb-mediated repression across  
90 eukaryotes and enables genetic studies that can be difficult in plant and animal systems. Indeed,  
91 genetic studies have provided insights into PRC2 control in *Neurospora*. Deletion of CAC-3  
92 causes region-specific losses of H3K27me3 at telomere-proximal domains, and telomere repeat  
93 sequences are sufficient to nucleate a new domain of H3K27me3-enriched chromatin (14, 32). In  
94 constitutive heterochromatin domains, heterochromatin protein-1 (HP1) prevents accumulation of  
95 H3K27me3 (33, 34). Thus, regulation of H3K27 methylation occurs at multiple levels. Despite  
96 recent advances, the mechanisms that regulate PRC2 in fungal systems and eukaryotes in general  
97 is poorly understood.

98           In addition to the core histones (H2A, H2B, H3, and H4), eukaryotes also encode non-  
99 allelic histone variants. One of the most conserved and extensively studied histone variants is  
100 H2A.Z, which is enriched proximal to transcription start sites (TSS) and in vertebrate enhancers  
101 (35-42). Functional studies of H2A.Z have linked presence of this variant in nucleosomes to gene  
102 activation, gene repression, maintaining chromatin accessibility, and a multitude of other  
103 functions (37, 43-50). Notably, H2A.Z has been implicated in the direct regulation of H3K27  
104 methylation in mouse Embryonic Stem Cells (mESCs) and in plants (51-53). In mESCs, there is  
105 a strong correlation between the activity of PRC2, enrichment of H3K27me3, and the presence  
106 of H2A.Z (54). Colocalization of SUZ12, a subunit of PRC2, and H2A.Z has been found in  
107 mESCs at developmentally important genes, such as HOX clusters (39). In addition, H2A.Z is  
108 differentially modified its N- and C- terminal tails at bivalent domains that are “poised” for  
109 activation or repression upon differentiation (53, 55). N-terminal acetylation (acH2A.Z) or C-  
110 terminal ubiquitylation (H2A.Zub) repress or stimulate the action of PRC2 through interactions

111 with the transcriptional activator BRD2 or the PcG protein complex PRC1 (53). It is important to  
112 note that functional studies of H2A.Z are challenging because this histone variant is essential for  
113 viability in most organisms, including *Drosophila*, *Tetrahymena*, mouse, and *Xenopus* (56-61).

114 In *Arabidopsis thaliana*, a genetic interaction between PICKLE (PKL), a chromatin  
115 remodeler which promotes H3K27me<sub>3</sub>, and PIE-1 (homolog to SWR-1), the remodeler which  
116 deposits H2A.Z, was recently reported (52). PKL has been found by ChIP-seq at loci enriched  
117 for H3K27me<sub>3</sub> and is proposed to determine levels of H3K27me<sub>3</sub> at repressed genes in  
118 *Arabidopsis* (62). In rice callus and seedlings, H2A.Z is found at the 5' and 3' ends of genes that  
119 are highly expressed. In repressed genes, H2A.Z is found along the gene body, and this pattern  
120 closely mimics the presence of H3K27me<sub>3</sub> (51). This is a notable difference between plants and  
121 other eukaryotes.

122 We investigated the relationship between H2A.Z and PRC2 in the filamentous  
123 ascomycete *Neurospora crassa* and report that H2A.Z is required for normal enrichment of  
124 H3K27me<sub>2/3</sub> across the genome. Our findings show that loss of H2A.Z leads to region-specific  
125 depletion of H3K27me<sub>2/3</sub> in *N. crassa*. Expression levels of *eed*, encoding a PRC2 subunit, are  
126 reduced in the absence of H2A.Z and ectopic expression of *eed* can restore H3K27me<sub>2/3</sub> in an  
127 H2A.Z-deficient strain. Together, these data suggest that H2A.Z regulates facultative  
128 heterochromatin through transcriptional regulation of the PRC2 component EED and points to  
129 differential requirements for EED at discrete PRC2-target domains.

130

131 RESULTS

132 **Normal patterns of H3K27me2/3 enrichment require the presence of H2A.Z or SWR-1**

133 Normal H3K27me2/3 patterns in plants and in mESCs depend on the histone variant  
134 H2A.Z (39, 52), but the underlying mechanism is poorly understood. To determine if H2A.Z also  
135 plays a role in Polycomb Group repression in *N. crassa*, we performed ChIP-seq to examine  
136 H3K27me2/3 enrichment in an H2A.Z deletion strain ( $\Delta hH2Az::hph$ , hereafter  $\Delta hH2Az$ ) and  
137 compared this to wild type. Inspection of the data in the IGV genome browser (63) revealed that  
138 the  $\Delta hH2Az$  mutant displayed a significant reduction in H3K27me2/3 (Figure 1A). To quantify  
139 the change in H3K27me2/3 patterns, we called peaks of H3K27me2/3 enrichment using  
140 Hypergeometric Optimization of Motif EnRichment (HOMER; version 4.8) (64). We identified  
141 325 peaks of H3K27me2/3 in wild type, hereafter referred to as PRC2-target domains (Table  
142 S2). Consistent with previous studies, these peaks comprised ~6% of the *N. crassa* genome (14,  
143 33). These regions are typically larger than single genes, ranging in size from 500 bp to 108 kb,  
144 with an average size of 7.7 kb. We next plotted H3K27me2/3 levels across the 5' end of all 325  
145 domains for wild type and  $\Delta hH2Az$  (Figure 1B). Inspection of heatmaps and the genome browser  
146 revealed that H3K27me2/3 levels were reduced in many, but not all PRC2-target domains in  
147  $\Delta hH2Az$ . Using HOMER software to identify PRC2-target domains in  $\Delta hH2Az$  revealed 239  
148 peaks (Table S3). These were slightly smaller, with an average size of 5.5 kb, and comprised  
149 only 3% of the *N. crassa* genome. To determine if the peaks observed in the  $\Delta hH2Az$  strain are in  
150 wild type locations we only compared peaks from assembled contigs. Using bedtools intersect  
151 we found that all peaks in  $\Delta hH2Az$  overlap with wild type peaks, indicating that  $\Delta hH2Az$  exhibits  
152 significant loss of H3K27me2/3 from normal domains but does not gain H3K27me2/3 in new  
153 locations (Table S4).

154           Since H2A.Z is required for maintaining genome stability in yeast and animals, our  
155 findings raised the possibility that a second site mutation could be responsible for the observed  
156 phenotype (46, 47, 65, 66). To confirm that loss of H3K27me<sub>2/3</sub> was due to the absence of  
157 H2A.Z, we first backcrossed the original deletion strain (FGSC 12088) to wild type (67). Four  
158 independent  $\Delta hH2Az$  progeny all displayed similar reduction in H3K27me<sub>2/3</sub> levels (Figure S1).  
159 In addition, the backcrossed  $\Delta hH2Az$  strain displayed slow and variable growth (Figure S2) and  
160 was hypersensitive to the DNA damaging agent MMS. This is consistent with previous studies  
161 that have demonstrated poor growth of  $\Delta hH2Az$  in *S. cerevisiae* and in *N. crassa* (68, 69).

162           We next introduced a wild type copy of the *hH2Az* gene with its native promoter into  
163  $\Delta hH2Az$  (Figure S3A). This complemented defects in growth and MMS-sensitivity, and fully  
164 restored H3K27 methylation, suggesting loss of H2A.Z was responsible for all observed  
165 phenotypes in the deletion mutant (Figure 1C and 1D, S2). Because a specific chromatin  
166 remodeling complex, SWR1, exchanges H2A.Z for H2A in plants, yeast and animals (69-73), we  
167 next examined H3K27me<sub>2/3</sub> in a deletion strain lacking the *N. crassa* homolog of the SWR1  
168 ATPase ( $\Delta swr-1$ ). The *swr-1* mutant displayed a similar reduction in H3K27me<sub>2/3</sub> (Figure 1C  
169 and D). Together, these data demonstrate that H2A.Z is required for normal H3K27me<sub>2/3</sub> in *N.*  
170 *crassa*.

171

### 172 **Deletion of *hH2Az* results in region-specific loss of H3K27me<sub>2/3</sub>**

173           Visual inspection of the ChIP-seq data revealed losses of H3K27me<sub>2/3</sub> from PRC2-target  
174 domains located at internal (i.e., non-subtelomeric regions >200kb from the telomere repeats)  
175 chromosome sites, but not at telomere-proximal sites (i.e., <200kb from the telomere repeats)  
176 (Figure 2A). To quantify this, we inspected ChIP-seq results for H3K27me<sub>2/3</sub> for both classes



177 and found retention of H3K27 methylation in telomere-proximal regions with progressive loss in  
178 domains farther from chromosome ends. Previously published work showed that a *cac-3*  
179 deficient strain has H3K27me<sub>2/3</sub> loss which was primarily observed in the telomere-proximal  
180 regions (14); *cac-3* encodes an accessory subunit of PRC2 in *N. crassa* homologous to the  
181 conserved PRC2 components Msl1-5, NURF55, Rpbp46/48, found in plants, *Drosophila*, and  
182 humans, respectively. The phenotype reported here for  $\Delta hH2A_Z$  appears to be the inverse of the  
183  $\Delta cac-3$  phenotype (Figure 2A).

184 To better visualize which regions of the genome in the  $\Delta cac-3$  or  $\Delta hH2A_Z$  strains lose  
185 enrichment of H3K27me<sub>2/3</sub>, we again divided all 325 H3K27me<sub>2/3</sub> peaks in the wild type strain  
186 into telomere-proximal sites (123 peaks, average size 8,261 bp) (Figure 2B, top) and internal  
187 sites (186 peaks, average size 7,509 bp) (Figure 2B, bottom). The loss was again most dramatic  
188 at the internal regions in the *hH2A\_Z* deletion strain, where most PRC2-target domains showed  
189 significant reduction of H3K27me<sub>2/3</sub> levels. In contrast, we found that telomere-proximal  
190 regions show normal levels of H3K27me<sub>2/3</sub>.

191 Previous work demonstrated that the placement of repetitive telomere repeat sequences  
192 (5'-TTAGGG-3') in a euchromatic locus can induce *de novo* H3K27 methylation across large  
193 regions (32). Together, these data demonstrate that the absence of H2A.Z is more detrimental for  
194 the establishment and/or maintenance of internal domains of H3K27me<sub>2/3</sub> in *N. crassa*.

195

### 196 ***Neurospora* H2A.Z localizes to promoter regions but not to PRC2-target domains**

197 We next asked if H2A.Z co-localizes with H3K27 methylation, as has been reported for  
198 plants and mESCs (39, 51, 52). We used a strain expressing a C-terminal H2A.Z-GFP fusion  
199 protein to perform ChIP-seq with antibodies against H3K27me<sub>2/3</sub> and GFP. Visual inspection of

200 the enrichment profiles in a genome browser revealed a mostly mutually exclusive localization  
201 pattern (Figure 3A). There are some small H2A.Z peaks that are found in PRC2 target domains,  
202 such as in Figure 3A; however, these were rare (Figure 3B). The genomic locations with the  
203 highest enrichment for H2A.Z-GFP are the regions immediately before and after the TSS of most  
204 genes, with low enrichment in gene bodies and 3' ends (Figure 3C). On average we find little  
205 enrichment of H2A.Z-GFP in the promoters and gene bodies of H3K27me2/3 enriched genes or  
206 at the center of H3K27me2/3 peaks, confirming that H3K27me2/3 and H2A.Z are largely  
207 mutually exclusive (Figure 3D and 3E).

208 To validate H2A.Z enrichment, we also performed ChIP-seq on wild type using an  
209 antibody raised against the native *N. crassa* H2A.Z protein (69). These H2A.Z ChIP-seq  
210 experiments show the same localization as the H2A.Z-GFP ChIP-seq experiments (Figure S4).  
211 The localization of H2A.Z at the TSS of 5,704 genes (over half of all genes) is similar to findings  
212 in multiple other organisms (35-42).

213

## 214 **H2A.Z is crucial for proper regulation of one third of the genes in *N. crassa*, including *eed***

215 Previous studies have implicated H2A.Z in multiple roles related to transcription  
216 including gene activation and repression (39, 47, 50, 53, 70, 71). We therefore asked if H2A.Z  
217 regulates H3K27me2/3 by regulating expression of one or more PRC2 components. We  
218 performed RNA sequencing of wild type,  $\Delta hH2Az$ ,  $\Delta set-7$ , and the double mutant  $\Delta hH2Az; \Delta set-$   
219  $7$  to determine which genes exhibit differential expression in the absence of H2A.Z. Deletion of  
220 histone variant H2A.Z causes both positive and negative mis-regulation of a large number of  
221 genes (Figure 4A). After Benjamini-Hochberg correction (72), there are 3,308 genes with  
222 differential transcription (adjusted  $p$  value  $< 0.05$ ). Of these 3,308 genes, there are similar

223 numbers of genes up- and downregulated in the absence of H2A.Z (1,665 genes upregulated and  
224 1,643 downregulated) (Figure 4A, Table S6).

225 We next examined expression levels of genes encoding individual PRC2 components  
226 (Figure 4B). We found that expression of *eed* is significantly reduced in  $\Delta hH2Az$  by more than 9-  
227 fold (FDR-corrected  $p$  value =  $2.70 \times 10^{10}$ ), whereas *cac-3*, *suz-12*, and *set-7* were expressed at  
228 similar levels in both wild type and  $\Delta hH2Az$  (Figures 4A and 4B).

229 The *eed* gene showed the most dramatic change in expression compared to wild type in  
230 either  $\Delta hH2Az$  or  $\Delta hH2Az;\Delta set-7$ , but is expressed normally in the single mutant  $\Delta set-7$ . This  
231 indicated that deletion of H2A.Z is likely responsible for its downregulation. As an essential  
232 component of PRC2, EED is required for catalytic activity. EED is also important for recognition  
233 of the H3K27me<sub>2/3</sub> mark and has been implicated in maintenance and/or spreading of  
234 H3K27me<sub>3</sub> from nucleation sites (73, 74). Since H2A.Z is localized proximal to the promoters  
235 of a little over half the genes (5,704) in the *N. crassa* genome, we examined the H2A.Z  
236 localization at the *eed* gene. There is a large peak of H2A.Z enrichment at the promoter of *eed*  
237 (Figure 4B), which appears to be crucial for normal *eed* expression. Promoters of other PRC2  
238 components are also enriched for H2A.Z, but apparently are not dependent on H2A.Z for their  
239 expression. Together, these data suggest that H2A.Z is required for the proper expression of *eed*.

240

#### 241 **Overexpression of EED rescues H3K27 methylation levels in the absence of H2A.Z**

242 To determine if downregulation of *eed* is responsible for the depletion of H3K27me<sub>2/3</sub>  
243 observed in  $\Delta hH2Az$ , we constructed a strain which lacks both *eed* and *hH2Az*, and we  
244 introduced a *3xflag-eed* construct into the *his-3* locus driven by the strong constitutive *clock*  
245 *controlled gene-1/glucose-repressible gene-1* (*ccg-1/grg-1*) promoter (*his-3::Pccg1-3xflag-eed*).

246 We calculated expected expression levels of this construct using native *ccg-1* levels, and we  
247 expect *eed* to be expressed at approximately 100 times the native level. To confirm this construct  
248 was being expressed at the same level in both the  $\Delta eed$  and  $\Delta eed;\Delta hH2Az$  backgrounds, we  
249 performed an anti-FLAG western blot (Figure S3B). Our results confirm that the deletion of  
250 H2A.Z does not alter 3xFLAG-EED expression driven by the *ccg-1* promoter. After performing  
251 H3K27me2/3 ChIP-seq in this strain, we find that the majority of H3K27me2/3 peaks are  
252 recovered in the genome (Figure 5A), but the growth rate of the  $\Delta hH2Az$  strain is not rescued.  
253 There are some qualitative differences in peak shape and not all peaks are fully restored (Figure  
254 5B), which could indicate that H2A.Z contributes to normal H3K27me2/3 via additional  
255 mechanisms. Nevertheless, the significant restoration of H3K27me2/3 suggests that reduced *eed*  
256 expression is the major contributor to the loss of H3K27me2/3 in the  $\Delta hH2Az$  strain.

257

258

## DISCUSSION

259 H2A.Z is a highly conserved histone variant that has been linked to gene activation and  
260 repression, and control of H3K27 methylation. We report here that *N. crassa* H2A.Z is required  
261 for normal methylation of H3K27 in facultative heterochromatin domains. In contrast to the  
262 situation in plants and animals, we find that *N. crassa* H2A.Z does not colocalize with  
263 H3K27me2/3. In undifferentiated mammalian cells and in plant cells, H2A.Z colocalized with  
264 PRC2 components, H3K27me3, SUZ12 or both (39, 51-55). In mESCs, H2A.Z is found at  
265 developmentally important loci where SUZ12 is also enriched (39, 55). In addition, this histone  
266 variant is proposed to regulate lineage commitment by functioning as a “molecular rheostat” to  
267 drive either activation or repression of genes (51, 53, 75). This colocalization of PRC2 and  
268 H2A.Z is not seen in differentiated murine cells, and ubiquitylated residues on the C-terminal tail

269 of H2A.Z have been hypothesized as integral for cells to maintain undifferentiated status (53,  
270 55). In plants, H2A.Z displays significant co-localization with H3K27me3 in the gene bodies of  
271 PcG-repressed genes even in differentiated tissues (51). Our work highlights an important  
272 structural difference between facultative heterochromatin in plants and filamentous fungi.  
273 Although we did not observe co-localization of H2A.Z and H3K27me2/3 in *N. crassa*, it remains  
274 possible that these two chromatin features overlap in specific developmental cell types (e.g.  
275 during sexual development or meiosis). Future work is needed to test this possibility.

276 In *N. crassa* we generally find histone H2A.Z at the promoters of a large number of genes  
277 in the genome. When viewing the localization using a metaplot, which averages the enrichment  
278 of all H2A.Z marked nucleosomes, it appears that H2A.Z flanks the TSS. Genome-wide  
279 localization of H2A.Z has been performed in a variety of organisms including *Arabidopsis*, *C.*  
280 *elegans*, *S. cerevisiae*, mouse, and *Drosophila*. H2A.Z is generally found in the promoters of  
281 active and inactive genes, as well as at in vertebrate enhancers (35, 37-42). The +1 nucleosome,  
282 first nucleosome after the TSS, containing H2A.Z has been postulated as a lower energy barrier  
283 to transcription elongation in *Drosophila* and *Arabidopsis* (35, 36). Our data are consistent with  
284 an important promoter-specific role for *N. crassa* H2A.Z.

285 Indeed, in *N. crassa* we find that the *eed* gene contains a large peak of H2A.Z in the +1  
286 nucleosome, and we find that H2A.Z is required for the proper expression of *eed*. To our  
287 knowledge this is the first report of H2A.Z specifically regulating the *eed* gene. Previous studies  
288 in mESCs demonstrate that appropriate binding of multiple factors to the *eed* promoter are  
289 required for the normal expression of *eed* (76, 77). It is possible that there are *N. crassa*  
290 transcription factors that bind to DNA sequences associated with the H2A.Z-containing  
291 nucleosome. Nucleosomes that contain H2A.Z protect approximately 120 bp of DNA from

292 MNase digestion as opposed to nucleosomes with canonical H2A that protect 147 bp (78). This  
293 may leave more sequence available for transcription factor binding between H2A.Z-containing  
294 nucleosomes.

295 We observed that reduced *eed* expression levels leads to region-specific losses of  
296 H3K27me<sub>2/3</sub>, rather than a more general, or global, reduction. In contrast to our work, reduced  
297 *Eed* is reported to cause a global decrease in H3K27me<sub>3</sub> in mESCs. In these cells, reduced  
298 expression of *Eed* was observed following downregulation of *Oct3/4*, which in turn led to a  
299 global reduction of H3K27me<sub>3</sub>, though these studies did not examine genome-wide patterns of  
300 H3K27me<sub>3</sub> by ChIP-seq as reported here (76, 77). In *N. crassa*, repetitive sequences (e.g., the  
301 canonical telomere repeats) are sufficient to induce an artificial H3K27me<sub>3</sub> domain when  
302 inserted into a locus normally devoid of H3K27me<sub>3</sub> (32). It is interesting that even though we  
303 also observe the loss of H3K27 methylation throughout much of the genome, regions proximal to  
304 the telomeres retained H3K27me<sub>2/3</sub>. This might suggest that PRC2 is being recruited to the  
305 telomeric region and the downregulation of *eed* causes a defect in the propagation of the  
306 H3K27me<sub>2/3</sub> modification into topologically associated, nearby regions. Another possibility is  
307 that the internal domains have a special requirement for EED in spreading, or for the  
308 maintenance of H3K27 methylation following DNA replication. Alternatively, EED may interact  
309 directly with transcription factors that control assembly of facultative heterochromatin at certain  
310 internal domains, while other PRC2-associated proteins may be more important for targeting  
311 PRC2 to telomeres. Future studies are needed to distinguish between these possible working  
312 models.

313

314

315 MATERIALS AND METHODS

316 **Strains and growth media:** Strains used in this study are listed in (Table S1). Strains were  
317 grown at 32°C in Vogel's Minimal Medium (VMM) with 1.5% sucrose or glucose for DNA  
318 based protocols, and RNA based protocols, respectively (79). Liquid cultures were shaken at 180  
319 rpm. Crosses were performed on Synthetic Crossing (SC) medium in the dark at room  
320 temperature (79). Ascospores were collected 14 days after fertilization. To isolate cross progeny,  
321 spores were spread on solid VMM plates containing FGS (1X Vogel's salts, 2% sorbose, 0.1%  
322 glucose, 0.1% fructose, and 1.5% agar) and incubated at 65°C for 1 hour as previously described  
323 (79), after which spores were picked using a sterile inoculating needle and transferred to agar  
324 slants with appropriate medium (typically VMM). To test for sensitivity to DNA damaging  
325 agents, 5 µL of a conidial suspension was spotted on VMM containing FGS (1X Vogel's salts,  
326 2% sorbose, 0.1% glucose, 0.1% fructose, and 1.5% agar) plates containing concentrations of  
327 methyl methanesulfonate (Sigma Aldrich cat. # 129925-5g) between 0.010% and 0.03% (w/v).

328 To construct the N-terminal FLAG-tagged *eed* allele, we amplified the *eed* region with  
329 primers, MK #51: GGCGGAGGCGGCGCGATGCAAATTTGTCGGGACCG and MK #52:  
330 TTAATTAATGGCGCGTTACTTCCCCACCGCTGAA (Table S5), from wild type genomic  
331 DNA (FGSC 4200). The amplified fragment was cloned into the *AscI* site of pBM61::CCGp-N-  
332 3xFLAG (80) by InFusion cloning (Takara, cat. # 639648). The new plasmid was then digested  
333 with *DraI* and transformed into a *his-3;mus-52::bar* strain. Primary transformants were selected  
334 on VMM plates, and then back-crossed to wild type to isolate homokaryons (*his-3::Pccg-1-*  
335 *3xflag-eed*). We next crossed the homokaryon (*his-3::Pccg-1-3xflag-eed*) to  $\Delta$ *eed::hph* (FGSC  
336 14852) to obtain  $\Delta$ *eed;his-3::Pccg-1-3xflag-eed*. 3xFLAG-EED expression and deletion of *eed*  
337 deletion were confirmed by western blots probed with anti-FLAG antibody (Sigma Aldrich, cat.

338 # F1804) and genotyped by PCR with primers, LL #155: TGCCTCGCTCCAGTCAATGACC  
339 and LL #466: TGTGGGCGATTTGAGCGTGC, respectively. The  $\Delta eed; his-3::Pccg-1-3xflag-$   
340  $eed$  strain was then crossed to the  $\Delta hH2Az::hph$  (FGSC 12088) strain to obtain  
341  $\Delta hH2Az; \Delta eed; his-3::Pccg-1-3xflag-eed$ . 3xFLAG-EED expression and deletion of  $eed$  were  
342 confirmed by western blots with anti-FLAG antibody (Sigma Aldrich, cat. # F1804) and  
343 genotyping with  $eed$  deletion primers (see above). Deletion of  $hH2Az$  was confirmed by PCR  
344 with primers AC #24: GAACAAGCCGATTGCTGTCC and AC #23:  
345 TGTATAGAACGCTGCCAAGGA.

346 For the H2AZ-GFP gene replacement construct, a 1-kb segment including the end of the  
347  $hH2Az$  coding region was amplified by PCR with primers #1577:

348 CGGAAAGGGCAAGTCGTCTG and #1578:

349 CCTCCGCCTCCGCCTCCGCCGCCTCCGCCAGCCTCCTGAGCCTTGGCCT and a 500-bp  
350 segment of the 3' flanking region was amplified with primers #1579:

351 TGCTATACGAAGTTATGGATCCGAGCTCGCTGCACCGAAAACTCGACG and #1580:

352 GTGACGAGGGGAGATTGCTC. The cassettes containing the GFP segment and the  $hph$  gene

353 were amplified using M13 forward and reverse primers from  $pGFP::hph::loxP$  (80). The three

354 fragments were mixed and then assembled by overlapping PCR with primers #1577 and #1580

355 above. The cassette was transformed into the  $\Delta mus-52$  strain (FGSC 15968) by electroporation.

356

357 **Transformation and complementation assays:** Transformations were performed as previously  
358 described (81). To carry out ectopic complementation of the  $\Delta hH2Az::hph$  strain, two linear gene  
359 fragments were electroporated into the mutant strain. Specifically, the  $bar$  (confers Basta  
360 resistance) was amplified with primers LL #148



361 CCGTCGACAGAAGATGATATTGAAGGAGC and LL #149  
362 AATTAACCCTCACTAAAGGGAACAAAAGC (82) and the wild type *hH2Az* gene fragment  
363 including its native promoter (genomic coordinate 1390154-1393398 of GCA\_000182925.2  
364 assembly accession) was amplified with primers AC #27 CCCAATCCTAGAATCCCGTCG and  
365 AC #21 TAAAAGAGCTGCTGTCGCACG, and fragments were co-integrated into the  
366  $\Delta hH2Az::hph$  strain, followed by selection of transformants on Basta-containing plates (VMM  
367 with 2% sorbose, 0.1% glucose, 0.1% fructose, 1.5% agar, and 200 ug/mL Basta). Transformants  
368 were transferred to agar slants and then screened by PCR, and Southern blots with the  
369 North2South Biotin Random Prime Labeling and Detection Kit (ThermoFisher cat. #17175) and  
370 the wild type *hH2Az* gene fragment used as a probe.

371  
372 **Race tube assay:** Race tubes were prepared with 15 mL of VMM plus 1.5% sucrose and 1.5%  
373 agar. Strains were grown on VMM plates with 1.5% sucrose and 1.5% agar for 16 hours before  
374 using a 6mm cork borer to extract mycelial agar plugs from the edge of growing hyphae. This  
375 plug was used for inoculating each tube at one end. Strains were inoculated in triplicate.  
376 Measurements were taken at 9, 23, 47 and 60 hours to determine linear growth rates.

377  
378 **Protein extraction and western blotting:** Strains were grown at 32°C shaken in 18x150mm  
379 glass test tubes at 180rpm in 5 mL VMM with 1.5% sucrose. After 16 hours, tissue was  
380 harvested using filtration, washed once in phosphate buffered saline (PBS), and suspended in 1  
381 mL of ice-cold protein extraction buffer (50mM HEPES pH 7.5, 150mM NaCl, 0.02% NP-40,  
382 1mM EDTA, 1mM phenylmethylsulfonyl fluoride [PMSF; Sigma, P7626], one tablet Roche  
383 cOmplete mini EDTA-free Protease Inhibitor Cocktail [Roche, cat. # 11836170001]). Tissue was

384 subjected to sonication by Diagenode Bioruptor UCD-200 to deliver 22.5 30 second pulses at  
385 4°C. After two rounds of centrifugation at 13,200 rpm for 10 minutes, supernatant was mixed  
386 with 2x Laemmli buffer and boiled for 5 minutes. Samples were separated by SDS-  
387 polyacrylamide gel electrophoresis (SDS-PAGE) and transferred to polyvinylidene difluoride  
388 (PVDF) membranes in Tris-Glycine transfer buffer (25mM Tris, 200mM glycine) containing  
389 20% methanol at constant 100V for 1 hour at 4°C. Membranes were blocked with Tris-buffered  
390 saline (TBS; 10 mM Tris, pH 7.5, 150mM NaCl) including 3% milk powder for 1 hour and  
391 incubated overnight with anti-FLAG antibody (Sigma Aldrich, cat. # F1804) in TBS plus 3%  
392 milk. Detection was performed with horseradish peroxidase-conjugated secondary antibodies and  
393 SuperSignal West Femto chemiluminescent substrate (ThermoFisher, cat. # 34094).

394

395 **Chromatin immunoprecipitation (ChIP):** To carry out ChIP, conidia were inoculated in 5 mL  
396 of liquid VMM plus 1.5% sucrose and grown for 18 hours for wild type and other strains with  
397 typical growth rates. Slow growing  $\Delta hH2Az::hph$  strains were grown for 24 hours to isolate  
398 cultures at a similar developmental stage. ChIP was performed as described previously (83-85).  
399 In brief, mycelia were harvested using filtration and were washed once in PBS prior to cross-  
400 linking for 10 minutes in PBS containing 1% formaldehyde on a rotating platform at room  
401 temperature. After 10 minutes, the reaction was quenched using 125mM glycine and placed back  
402 on the rotating platform for five minutes. Mycelia were harvested again using filtration, washed  
403 once with PBS, then resuspended in 600  $\mu$ l of ChIP lysis buffer (50mM HEPES, pH 7.5, 140mM  
404 NaCl, 1mM EDTA, 1% Triton X-100, 0.1% sodium deoxycholate, one tablet Roche cOplete  
405 mini EDTA-free Protease Inhibitor Cocktail (Roche, cat. # 11836170001) in 15 mL conical  
406 tubes. Chromatin was sheared by sonication after lysing cell walls with the QSONICA Misonix

407 S-4000 ultrasonic processor (amplitude 10, 30 second processing, one second on, one second  
408 off), using the Diagenode Bioruptor UCD-200 (Intensity level: Medium, three rounds of 15  
409 minutes (30 seconds on, 30 seconds off) to deliver 22.5 30 second pulses at 4°C. Water  
410 temperature was kept at a constant 4°C by using a Biorad cooling module (cat. # 170-3654) with  
411 variable speed pump to circulate 4°C water while processing samples. Lysates were centrifuged  
412 at 13,000 rpm in an Eppendorf 5415D microcentrifuge for five minutes at 4°C. For CHIP  
413 reactions with antibodies against *N. crassa* H2A.Z, 1 µl, 2.5 µl, or 5 µl of antibody was used  
414 (antibody supplied by Dr. Qun He, China Agricultural University). For detection of H3K27 di-  
415 and tri-methylation (H3K27me<sub>2</sub>me<sub>3</sub>; Active Motif 39535), and GFP-tagged H2A.Z (GFP;  
416 Rockland 600-301-215) 1 µl of the relevant antibody was used. Protein A/G beads (20 µl) (Santa  
417 Cruz, cat. # sc-2003) were added to each sample. Following overnight incubation, beads were  
418 washed twice with 1 mL lysis buffer without protease inhibitors, once with lysis buffer  
419 containing 500mM NaCl, once with lysis buffer containing 50mM LiCl, and finally with TE  
420 (10mM Tris-HCl, 1mM EDTA). Bound chromatin was eluted in TES (50mM Tris pH 8.0,  
421 10mM EDTA, 10% SDS) at 65°C for 10 minutes. Chromatin was de-crosslinked overnight at  
422 65°C. The DNA was treated with RNase A for two hours at 50°C, then with proteinase K for two  
423 hours at 50°C and extracted using phenol-chloroform-isoamyl alcohol (25:24:1) followed by  
424 chloroform extraction. DNA pellets were washed with 70% ethanol and resuspended in TE  
425 buffer. Samples were then prepared for Illumina sequencing.

426

427 **RNA extraction:** Conidia were inoculated into 100 x 15mm plates containing 25 mL of VMM +  
428 1.5% glucose and grown for 36-48 hours to generate mycelial mats. Using a 9mm cork borer, 5-7  
429 disks were cut out of the mycelial mat and transferred to 125 mL flasks with 50 mL of VMM +

430 1.5% glucose and allowed to grow for 12 hours at 29°C in constant light while agitating at ~90-  
431 100 rpm. Disks were harvested using filtration and flash frozen with liquid nitrogen. Frozen  
432 tissue was transferred to 1.5 mL RNase-free tubes with 100 µL sterile RNase-free glass beads and  
433 vortexed to lyse tissue in phenol:chloroform (5:1) pH 4.5. Three sequential acid  
434 phenol:chloroform extractions were performed followed by ethanol precipitation using two  
435 volumes of ethanol and 1/10 volume of 3M NaOAc pH 5.2, incubated overnight at -20°C.  
436 Samples were centrifuged at 13,200 rpm in 4°C for 30 minutes and pellets were then washed in  
437 RNase-free 70% ethanol, and resuspended in RNase-free water. Samples were quantified using  
438 the Invitrogen Qubit 2.0 fluorometer (cat. # Q32866) and RNA quality was checked on a  
439 denaturing agarose gel. After quality was verified 10 µg of RNA for each sample was subjected  
440 to Turbo DNase treatment (Invitrogen, cat. # AM2238) at 37°C for 30 minutes and then another  
441 acid phenol:chloroform extraction was performed to inactivate enzyme and purify the RNA.  
442 Samples were subjected to another ethanol precipitation as described above, this time with the  
443 addition of 1 µL of RNase-free glycogen (5 mg/mL). Samples were centrifuged at 13,200 rpm in  
444 4°C for 30 minutes and the pellets were washed with RNase-free 70% ethanol, then resuspended  
445 in RNase-free water. Quality and quantity were again checked with denaturing gel and with the  
446 Invitrogen Qubit 2.0 fluorometer. Samples were then prepared for Illumina sequencing.

447

448 **ChIP library preparation:** Libraries were constructed as described (83-85). In brief, the  
449 NEBNext Ultra II End Repair/dA-tailing Module (cat. # E7546S), NEBNext Ultra II Ligation  
450 Module (cat. # E7546) were used to clean and A-tail DNA after which Illumina adapters were  
451 ligated. The ligation products were amplified to generate dual-indexed libraries using NEBNext  
452 Ultra II Q5 Hot Start HiFi PCR Master Mix (cat. # M0543S). Size selection with magnetic beads

453 was performed after the adapter ligation and PCR steps with Sera-Mag SpeedBeads (cat. #  
454 65152105050250) suspended in a solution of (20mM PEG 8000, 1mM NaCl, 10mM Tris-HCl,  
455 1mM EDTA) (86).

456

457 **RNA library preparation:** Libraries were prepared according to the Illumina TruSeq mRNA  
458 stranded Library Kit (cat. # RS-122-2101). In brief, mRNA selection via polyA tails was  
459 performed using RNA purification beads and washed with bead washing buffer. Fragmentation  
460 and cleanup were performed enzymatically using the Fragment, Prime, Finish Mix and incubated  
461 at 94°C for eight minutes. First strand synthesis using the SuperScript II RT enzyme and First  
462 Strand Synthesis Act D Mix was incubated as described and second strand synthesis used the  
463 Second Strand Marking Mix with resuspension buffer was incubated for one hour to generate  
464 cDNA. The final steps in the library preparation are the same as the above ChIP-seq library  
465 preparation with exception of two extra bead cleanup steps: one prior to A-tailing and adapter  
466 ligation, two after adapter ligation.

467

468 Libraries were pooled and sequenced on a NextSeq500 instrument at the Georgia Genomics and  
469 Bioinformatics Core to generate single or paired-end reads.

470

#### 471 **Data Analysis**

472 For ChIP-seq data, short reads (<20 bp) and adaptor sequences were removed using TrimGalore  
473 (version 0.4.4), cutadapt version 1.14 (87), and Python 2.7.8, with fastqc command (version  
474 0.11.3). Trimmed Illumina reads were aligned to the current *N. crassa* NC12 genome assembly  
475 available from NCBI (accession # GCA\_000182925.2) using the BWA (version 0.7.15) (88),

476 mem algorithm, which randomly assign multi-mapped reads to a single location. Files were  
477 sorted and indexed using SAMtools (version 1.9) (89). To plot the relative distribution of  
478 mapped reads, read counts were determined for each 50 bp window across the genome using  
479 DeepTools to generate bigwigs (version 3.3.1) (90) with the parameters `-normalizeUsing CPM`  
480 (counts per million) and data were displayed using the Integrated Genome Viewer (63). The  
481 Hypergeometric Optimization of Motif EnRichment (HOMER) software package (version 4.8)  
482 (64) was used to identify H3K27me3 peaks in wild type and  $\Delta hH2Az$  against input using  
483 “findPeaks.pl” with the following parameters: `-style histone`. Bedtools (version 2.27.1)  
484 “intersect” (version 2.26.0) was used to determine the number of peaks that intersect with other  
485 peak files. Heatmaps, Spearman correlation matrix (Figure S5) and line plots were constructed  
486 with DeepTools (version 3.3.1) (90).

487

488 For RNA-seq data, short reads (<20 bp) and adaptor sequences were removed using TrimGalore  
489 (version 0.4.4), cutadapt version 1.14 (87), and Python 2.7.8, with fastqc command (version  
490 0.11.3). Trimmed Illumina single-end reads were mapped to the current *N. crassa* NC12 genome  
491 assembly using the Hierarchical Indexing for Spliced Alignment of Transcripts 2 (HISAT2:  
492 version 2.1.0) (91) with parameters `-RNA-strandness R` then sorted and indexed using SAMtools  
493 (version 1.9) (89). FeatureCounts from Subread (version 1.6.2) (92) was used to generate gene  
494 level counts for all RNA bam files. Raw counts were imported into R and differential gene  
495 expression analysis was conducted using Bioconductor: DeSeq2 (93). Volcano plot and box plots  
496 were generated in R using DeSeq2 and ggplot2 (94).

497

498 **Data Deposition:** Raw sequence data associated with this paper are available through the NCBI  
499 GEO database (accession # GSE146611).

500

## 501 **Acknowledgements**

502 This work was supported by grants from the American Cancer Society (RSG-14-184-01-DMC)  
503 and the NIH (R01GM132644) to Z.A.L and the National Science Foundation Graduate Research  
504 Fellowship Program Grant (DGE-1443117) to A.J.C. We thank the undergraduate students who  
505 contributed to this work JongIn Hwang, Vlad Sirbu, Jacqueline Nutter, and Preston Trevor Neal.  
506 We are grateful to Robert J. Schmitz and Christina Ethridge for RNA-seq library support and the  
507 Georgia Genomic and Bioinformatics Core for sequencing.

508

## 509 **References**

- 510 1. Luger K. Structure and dynamic behavior of nucleosomes. *Current Opinion in Genetics*  
511 *& Development*. 2003;13(2):127-35.
- 512 2. Muller J. Transcriptional silencing by the Polycomb protein in *Drosophila* embryos.  
513 *EMBO J*. 1995;14(6):1209-20.
- 514 3. Hennig L, Derkacheva M. Diversity of Polycomb group complexes in plants: same rules,  
515 different players? *Trends Genet*. 2009;25(9):414-23.
- 516 4. Simon JA, Kingston RE. Mechanisms of polycomb gene silencing: knowns and  
517 unknowns. *Nat Rev Mol Cell Biol*. 2009;10(10):697-708.
- 518 5. Schuettengruber B, Bourbon HM, Di Croce L, Cavalli G. Genome Regulation by  
519 Polycomb and Trithorax: 70 Years and Counting. *Cell*. 2017;171(1):34-57.
- 520 6. Kuroda MI, Kang H, De S, Kassis JA. Dynamic Competition of Polycomb and Trithorax  
521 in Transcriptional Programming. *Annu Rev Biochem*. 2020.
- 522 7. Muller J, Hart CM, Francis NJ, Vargas ML, Sengupta A, Wild B, et al. Histone  
523 methyltransferase activity of a *Drosophila* Polycomb group repressor complex. *Cell*.  
524 2002;111(2):197-208.
- 525 8. Cao R, Wang L, Wang H, Xia L, Erdjument-Bromage H, Tempst P, et al. Role of histone  
526 H3 lysine 27 methylation in Polycomb-group silencing. *Science*. 2002;298(5595):1039-43.
- 527 9. Czermin B, Melfi R, McCabe D, Seitz V, Imhof A, Pirrotta V. *Drosophila* enhancer of  
528 Zeste/ESC complexes have a histone H3 methyltransferase activity that marks chromosomal  
529 polycomb sites. *Cell*. 2002;111(2):185-96.

- 530 10. Kuzmichev A, Nishioka K, Erdjument-Bromage H, Tempst P, Reinberg D. Histone  
531 methyltransferase activity associated with a human multiprotein complex containing the  
532 Enhancer of Zeste protein. *Genes Dev.* 2002;16(22):2893-905.
- 533 11. Veerappan CS, Avramova Z, Moriyama EN. Evolution of SET-domain protein families  
534 in the unicellular and multicellular Ascomycota fungi. *BMC Evol Biol.* 2008;8:190.
- 535 12. Aramayo R, Selker EU. *Neurospora crassa*, a model system for epigenetics research.  
536 *Cold Spring Harb Perspect Biol.* 2013;5(10):a017921.
- 537 13. Connolly LR, Smith KM, Freitag M. The *Fusarium graminearum* histone H3 K27  
538 methyltransferase KMT6 regulates development and expression of secondary metabolite gene  
539 clusters. *PLoS Genet.* 2013;9(10):e1003916.
- 540 14. Jamieson K, Rountree MR, Lewis ZA, Stajich JE, Selker EU. Regional control of histone  
541 H3 lysine 27 methylation in *Neurospora*. *Proc Natl Acad Sci U S A.* 2013;110(15):6027-32.
- 542 15. Chujo T, Scott B. Histone H3K9 and H3K27 methylation regulates fungal alkaloid  
543 biosynthesis in a fungal endophyte-plant symbiosis. *Mol Microbiol.* 2014;92(2):413-34.
- 544 16. Schotanus K, Soyer JL, Connolly LR, Grandaubert J, Happel P, Smith KM, et al. Histone  
545 modifications rather than the novel regional centromeres of *Zymoseptoria tritici* distinguish core  
546 and accessory chromosomes. *Epigenet Chromatin.* 2015;8.
- 547 17. Studt L, Rosler SM, Burkhardt I, Arndt B, Freitag M, Humpf HU, et al. Knock-down of  
548 the methyltransferase Kmt6 relieves H3K27me3 and results in induction of cryptic and otherwise  
549 silent secondary metabolite gene clusters in *Fusarium fujikuroi*. *Environ Microbiol.*  
550 2016;18(11):4037-54.
- 551 18. Dumesic PA, Homer CM, Moresco JJ, Pack LR, Shanle EK, Coyle SM, et al. Product  
552 Binding Enforces the Genomic Specificity of a Yeast Polycomb Repressive Complex. *Cell.*  
553 2015;160(1-2):204-18.
- 554 19. Jones RS, Gelbart WM. The *Drosophila* Polycomb-group gene Enhancer of zeste  
555 contains a region with sequence similarity to trithorax. *Mol Cell Biol.* 1993;13(10):6357-66.
- 556 20. Chen H, Rossier C, Antonarakis SE. Cloning of a human homolog of the *Drosophila*  
557 enhancer of zeste gene (EZH2) that maps to chromosome 21q22.2. *Genomics.* 1996;38(1):30-7.
- 558 21. Abel KJ, Brody LC, Valdes JM, Erdos MR, McKinley DR, Castilla LH, et al.  
559 Characterization of EZH1, a human homolog of *Drosophila* Enhancer of zeste near BRCA1.  
560 *Genomics.* 1996;37(2):161-71.
- 561 22. Goodrich J, Puangsomlee P, Martin M, Long D, Meyerowitz EM, Coupland G. A  
562 Polycomb-group gene regulates homeotic gene expression in *Arabidopsis*. *Nature.*  
563 1997;386(6620):44-51.
- 564 23. Grossniklaus U, Vielle-Calzada JP, Hoepfner MA, Gagliano WB. Maternal control of  
565 embryogenesis by MEDEA, a polycomb group gene in *Arabidopsis*. *Science.*  
566 1998;280(5362):446-50.
- 567 24. Chanvivattana Y, Bishopp A, Schubert D, Stock C, Moon YH, Sung ZR, et al. Interaction  
568 of Polycomb-group proteins controlling flowering in *Arabidopsis*. *Development.*  
569 2004;131(21):5263-76.
- 570 25. Schwartz YB, Pirrotta V. Polycomb silencing mechanisms and the management of  
571 genomic programmes. *Nat Rev Genet.* 2007;8(1):9-22.
- 572 26. Schumacher A, Lichtarge O, Schwartz S, Magnuson T. The murine Polycomb-group  
573 gene *eed* and its human orthologue: functional implications of evolutionary conservation.  
574 *Genomics.* 1998;54(1):79-88.



- 575 27. Birve A, Sengupta AK, Beuchle D, Larsson J, Kennison JA, Rasmuson-Lestander A, et  
576 al. Su(z)12, a novel Drosophila Polycomb group gene that is conserved in vertebrates and plants.  
577 Development. 2001;128(17):3371-9.
- 578 28. Derkacheva M, Steinbach Y, Wildhaber T, Mozgova I, Mahrez W, Nanni P, et al.  
579 Arabidopsis MSI1 connects LHP1 to PRC2 complexes. EMBO J. 2013;32(14):2073-85.
- 580 29. Huang S, Lee WH, Lee EY. A cellular protein that competes with SV40 T antigen for  
581 binding to the retinoblastoma gene product. Nature. 1991;350(6314):160-2.
- 582 30. Qian YW, Wang YC, Hollingsworth RE, Jr., Jones D, Ling N, Lee EY. A  
583 retinoblastoma-binding protein related to a negative regulator of Ras in yeast. Nature.  
584 1993;364(6438):648-52.
- 585 31. Lewis ZA. Polycomb Group Systems in Fungi: New Models for Understanding  
586 Polycomb Repressive Complex 2. Trends Genet. 2017;33(3):220-31.
- 587 32. Jamieson K, McNaught KJ, Ormsby T, Leggett NA, Honda S, Selker EU. Telomere  
588 repeats induce domains of H3K27 methylation in Neurospora. Elife. 2018;7.
- 589 33. Basenko EY, Sasaki T, Ji LX, Prybol CJ, Burckhardt RM, Schmitz RJ, et al. Genome-  
590 wide redistribution of H3K27me3 is linked to genotoxic stress and defective growth. P Natl  
591 Acad Sci USA. 2015;112(46):E6339-E48.
- 592 34. Jamieson K, Wiles ET, McNaught KJ, Sidoli S, Leggett N, Shao YC, et al. Loss of HP1  
593 causes depletion of H3K27me3 from facultative heterochromatin and gain of H3K27me2 at  
594 constitutive heterochromatin. Genome Research. 2016;26(1):97-107.
- 595 35. Weber CM, Ramachandran S, Henikoff S. Nucleosomes are context-specific, H2A.Z-  
596 modulated barriers to RNA polymerase. Mol Cell. 2014;53(5):819-30.
- 597 36. Dai X, Bai Y, Zhao L, Dou X, Liu Y, Wang L, et al. H2A.Z Represses Gene Expression  
598 by Modulating Promoter Nucleosome Structure and Enhancer Histone Modifications in  
599 Arabidopsis. Mol Plant. 2017;10(10):1274-92.
- 600 37. Guillemette B, Bataille AR, Gevry N, Adam M, Blanchette M, Robert F, et al. Variant  
601 histone H2A.Z is globally localized to the promoters of inactive yeast genes and regulates  
602 nucleosome positioning. Plos Biol. 2005;3(12):2100-10.
- 603 38. Barski A, Cuddapah S, Cui K, Roh TY, Schones DE, Wang Z, et al. High-resolution  
604 profiling of histone methylations in the human genome. Cell. 2007;129(4):823-37.
- 605 39. Creighton MP, Markoulaki S, Levine SS, Hanna J, Lodato MA, Sha K, et al. H2AZ is  
606 enriched at polycomb complex target genes in ES cells and is necessary for lineage commitment.  
607 Cell. 2008;135(4):649-61.
- 608 40. Bargaje R, Alam MP, Patowary A, Sarkar M, Ali T, Gupta S, et al. Proximity of H2A.Z  
609 containing nucleosome to the transcription start site influences gene expression levels in the  
610 mammalian liver and brain. Nucleic acids research. 2012;40(18):8965-78.
- 611 41. Latorre I, Chesney MA, Garrigues JM, Stempor P, Appert A, Francesconi M, et al. The  
612 DREAM complex promotes gene body H2A.Z for target repression. Genes Dev. 2015;29(5):495-  
613 500.
- 614 42. Gomez-Zambrano A, Merini W, Calonje M. The repressive role of Arabidopsis H2A.Z in  
615 transcriptional regulation depends on AtBMI1 activity. Nat Commun. 2019;10(1):2828.
- 616 43. Bruce K, Myers FA, Mantouvalou E, Lefevre P, Greaves I, Bonifer C, et al. The  
617 replacement histone H2A.Z in a hyperacetylated form is a feature of active genes in the chicken.  
618 Nucleic acids research. 2005;33(17):5633-9.

- 619 44. Neves LT, Douglass S, Spreafico R, Venkataramanan S, Kress TL, Johnson TL. The  
620 histone variant H2A.Z promotes efficient cotranscriptional splicing in *S. cerevisiae*. *Genes*  
621 & *Development*. 2017;31(7):702-17.
- 622 45. Xu Y, Ayrapetov MK, Xu C, Gursoy-Yuzugullu O, Hu Y, Price BD. Histone H2A.Z  
623 controls a critical chromatin remodeling step required for DNA double-strand break repair. *Mol*  
624 *Cell*. 2012;48(5):723-33.
- 625 46. Rangasamy D, Greaves I, Tremethick DJ. RNA interference demonstrates a novel role  
626 for H2A.Z in chromosome segregation. *Nat Struct Mol Biol*. 2004;11(7):650-5.
- 627 47. Dhillon N, Oki M, Szyjka SJ, Aparicio OM, Kamakaka RT. H2A.Z functions to regulate  
628 progression through the cell cycle. *Mol Cell Biol*. 2006;26(2):489-501.
- 629 48. Meneghini MD, Wu M, Madhani HD. Conserved histone variant H2A.Z protects  
630 euchromatin from the ectopic spread of silent heterochromatin. *Cell*. 2003;112(5):725-36.
- 631 49. Adam M, Robert F, Larochelle M, Gaudreau L. H2A.Z is required for global chromatin  
632 integrity and for recruitment of RNA polymerase II under specific conditions. *Molecular and*  
633 *Cellular Biology*. 2001;21(18):6270-9.
- 634 50. Hu G, Cui K, Northrup D, Liu C, Wang C, Tang Q, et al. H2A.Z facilitates access of  
635 active and repressive complexes to chromatin in embryonic stem cell self-renewal and  
636 differentiation. *Cell Stem Cell*. 2013;12(2):180-92.
- 637 51. Zhang K, Xu W, Wang C, Yi X, Zhang W, Su Z. Differential deposition of H2A.Z in  
638 combination with histone modifications within related genes in *Oryza sativa* callus and seedling.  
639 *Plant J*. 2017;89(2):264-77.
- 640 52. Carter B, Bishop B, Ho KK, Huang R, Jia W, Zhang H, et al. The Chromatin Remodelers  
641 PKL and PIE1 Act in an Epigenetic Pathway That Determines H3K27me3 Homeostasis in  
642 *Arabidopsis*. *Plant Cell*. 2018;30(6):1337-52.
- 643 53. Surface LE, Fields PA, Subramanian V, Behmer R, Udeshi N, Peach SE, et al. H2A.Z.1  
644 Monoubiquitylation Antagonizes BRD2 to Maintain Poised Chromatin in ESCs. *Cell Rep*.  
645 2016;14(5):1142-55.
- 646 54. Wang Y, Long H, Yu J, Dong L, Wassef M, Zhuo B, et al. Histone variants H2A.Z and  
647 H3.3 coordinately regulate PRC2-dependent H3K27me3 deposition and gene expression  
648 regulation in mES cells. *BMC Biol*. 2018;16(1):107.
- 649 55. Ku M, Jaffe JD, Koche RP, Rheinbay E, Endoh M, Koseki H, et al. H2A.Z landscapes  
650 and dual modifications in pluripotent and multipotent stem cells underlie complex genome  
651 regulatory functions. *Genome biology*. 2012;13(10):R85.
- 652 56. van Daal A, Elgin SC. A histone variant, H2AvD, is essential in *Drosophila*  
653 *melanogaster*. *Mol Biol Cell*. 1992;3(6):593-602.
- 654 57. Clarkson MJ, Wells JR, Gibson F, Saint R, Tremethick DJ. Regions of variant histone  
655 His2AvD required for *Drosophila* development. *Nature*. 1999;399(6737):694-7.
- 656 58. Liu X, Li B, GorovskyMa. Essential and nonessential histone H2A variants in  
657 *Tetrahymena thermophila*. *Mol Cell Biol*. 1996;16(8):4305-11.
- 658 59. Faast R, Thonglairoam V, Schulz TC, Beall J, Wells JR, Taylor H, et al. Histone variant  
659 H2A.Z is required for early mammalian development. *Curr Biol*. 2001;11(15):1183-7.
- 660 60. Iouzalén N, Moreau J, Mechali M. H2A.ZI, a new variant histone expressed during  
661 *Xenopus* early development exhibits several distinct features from the core histone H2A. *Nucleic*  
662 *acids research*. 1996;24(20):3947-52.

- 663 61. Ridgway P, Brown KD, Rangasamy D, Svensson U, Tremethick DJ. Unique residues on  
664 the H2A.Z containing nucleosome surface are important for *Xenopus laevis* development. *J Biol*  
665 *Chem.* 2004;279(42):43815-20.
- 666 62. Zhang H, Bishop B, Ringenberg W, Muir WM, Ogas J. The CHD3 remodeler PICKLE  
667 associates with genes enriched for trimethylation of histone H3 lysine 27. *Plant Physiol.*  
668 2012;159(1):418-32.
- 669 63. Thorvaldsdottir H, Robinson JT, Mesirov JP. Integrative Genomics Viewer (IGV): high-  
670 performance genomics data visualization and exploration. *Brief Bioinform.* 2013;14(2):178-92.
- 671 64. Heinz S, Benner C, Spann N, Bertolino E, Lin YC, Laslo P, et al. Simple combinations of  
672 lineage-determining transcription factors prime cis-regulatory elements required for macrophage  
673 and B cell identities. *Mol Cell.* 2010;38(4):576-89.
- 674 65. Krogan NJ, Baetz K, Keogh MC, Datta N, Sawa C, Kwok TCY, et al. Regulation of  
675 chromosome stability by the histone H2A variant Htz1, the Swr1 chromatin remodeling  
676 complex, and the histone acetyltransferase NuA4. *Proc Natl Acad Sci USA.*  
677 2004;101(37):13513-8.
- 678 66. Greaves IK, Rangasamy D, Ridgway P, Tremethick DJ. H2A.Z contributes to the unique  
679 3D structure of the centromere. *Proc Natl Acad Sci U S A.* 2007;104(2):525-30.
- 680 67. Colot HV, Park G, Turner GE, Ringelberg C, Crew CM, Litvinkova L, et al. A high-  
681 throughput gene knockout procedure for *Neurospora* reveals functions for multiple transcription  
682 factors. *Proc Natl Acad Sci U S A.* 2006;103(27):10352-7.
- 683 68. Jackson JD, Gorovsky MA. Histone H2A.Z has a conserved function that is distinct from  
684 that of the major H2A sequence variants. *Nucleic acids research.* 2000;28(19):3811-6.
- 685 69. Liu X, Dang Y, Matsu-ura T, He Y, He Q, Hong CI, et al. DNA Replication Is Required  
686 for Circadian Clock Function by Regulating Rhythmic Nucleosome Composition. *Mol Cell.*  
687 2017;67(2):203-13.e4.
- 688 70. Kim K, Punj V, Choi J, Heo K, Kim JM, Laird PW, et al. Gene dysregulation by histone  
689 variant H2A.Z in bladder cancer. *Epigenet Chromatin.* 2013;6.
- 690 71. Valdes-Mora F, Song JZ, Statham AL, Strbenac D, Robinson MD, Nair SS, et al.  
691 Acetylation of H2A.Z is a key epigenetic modification associated with gene deregulation and  
692 epigenetic remodeling in cancer. *Genome Res.* 2012;22(2):307-21.
- 693 72. Yoav Benjamini, Hochberg Y. Controlling the False Discovery Rate: A Practical and  
694 Powerful Approach to Multiple Testing. *Journal of the Royal Statistical Society: Series B*  
695 *(Methodological).* 1995;57(1):289-300.
- 696 73. Xu C, Bian C, Yang W, Galka M, Ouyang H, Chen C, et al. Binding of different histone  
697 marks differentially regulates the activity and specificity of polycomb repressive complex 2  
698 (PRC2). *Proc Natl Acad Sci U S A.* 2010;107(45):19266-71.
- 699 74. Hansen KH, Bracken AP, Pasini D, Dietrich N, Gehani SS, Monrad A, et al. A model for  
700 transmission of the H3K27me3 epigenetic mark. *Nat Cell Biol.* 2008;10(11):1291-300.
- 701 75. Subramanian V, Fields PA, Boyer LA. H2A.Z: a molecular rheostat for transcriptional  
702 control. *F1000Prime Rep.* 2015;7:01.
- 703 76. Ura H, Usuda M, Kinoshita K, Sun C, Mori K, Akagi T, et al. STAT3 and Oct-3/4  
704 control histone modification through induction of Eed in embryonic stem cells. *J Biol Chem.*  
705 2008;283(15):9713-23.
- 706 77. Ura H, Murakami K, Akagi T, Kinoshita K, Yamaguchi S, Masui S, et al. Eed/Sox2  
707 regulatory loop controls ES cell self-renewal through histone methylation and acetylation. *Embo*  
708 *Journal.* 2011;30(11):2190-204.

- 709 78. Tolstorukov MY, Kharchenko PV, Goldman JA, Kingston RE, Park PJ. Comparative  
710 analysis of H2A.Z nucleosome organization in the human and yeast genomes. *Genome Res.*  
711 2009;19(6):967-77.
- 712 79. Davis R, de Serres F. Genetic and microbiological research techniques for *Neurospora*  
713 *crassa*. *Methods in Enzymology.* 1970;17:79-143.
- 714 80. Honda S, Selker EU. Tools for fungal proteomics: multifunctional *neurospora* vectors for  
715 gene replacement, protein expression and protein purification. *Genetics.* 2009;182(1):11-23.
- 716 81. Margolin BS, Freitag, M., and Selker, E.U. Improved plasmids for gene targeting at the  
717 *his-3* locus of *Neurospora crassa* by electroporation. *Fungal Genetics Newsletter.* 1997;44:2.
- 718 82. Avalos J, Geever RF, Case ME. Bialaphos resistance as a dominant selectable marker in  
719 *Neurospora crassa*. *Curr Genet.* 1989;16(5-6):369-72.
- 720 83. Ferraro AR, Lewis ZA. ChIP-Seq Analysis in *Neurospora crassa*. *Methods Mol Biol.*  
721 2018;1775:241-50.
- 722 84. Seymour M, Ji L, Santos AM, Kamei M, Sasaki T, Basenko EY, et al. Histone H1 Limits  
723 DNA Methylation in *Neurospora crassa*. *G3 (Bethesda).* 2016;6(7):1879-89.
- 724 85. Sasaki T, Lynch KL, Mueller CV, Friedman S, Freitag M, Lewis ZA. Heterochromatin  
725 controls gammaH2A localization in *Neurospora crassa*. *Eukaryot Cell.* 2014;13(8):990-1000.
- 726 86. Rohland N, Reich D. Cost-effective, high-throughput DNA sequencing libraries for  
727 multiplexed target capture. *Genome Research.* 2012;22(5):939-46.
- 728 87. Martin M. Cutadapt Removes Adapter Sequences From High-Throughput Sequencing  
729 Reads. *EMBnet.* 2011;17(1):2.
- 730 88. Li H, Durbin R. Fast and accurate short read alignment with Burrows-Wheeler transform.  
731 *Bioinformatics.* 2009;25(14):1754-60.
- 732 89. Li H, Handsaker B, Wysoker A, Fennell T, Ruan J, Homer N, et al. The Sequence  
733 Alignment/Map format and SAMtools. *Bioinformatics.* 2009;25(16):2078-9.
- 734 90. Ramirez F, Ryan DP, Gruning B, Bhardwaj V, Kilpert F, Richter AS, et al. deepTools2: a  
735 next generation web server for deep-sequencing data analysis. *Nucleic acids research.*  
736 2016;44(W1):W160-5.
- 737 91. Kim D, Paggi JM, Park C, Bennett C, Salzberg SL. Graph-based genome alignment and  
738 genotyping with HISAT2 and HISAT-genotype. *Nature biotechnology.* 2019;37(8):907-15.
- 739 92. Liao Y, Smyth GK, Shi W. The Subread aligner: fast, accurate and scalable read mapping  
740 by seed-and-vote. *Nucleic acids research.* 2013;41(10):e108.
- 741 93. Love MI, Huber W, Anders S. Moderated estimation of fold change and dispersion for  
742 RNA-seq data with DESeq2. *Genome biology.* 2014;15(12).
- 743 94. Wickham H. *Ggplot2 : elegant graphics for data analysis.* New York: Springer; 2009.  
744 viii, 212 p. p.  
745

746

747 FIGURE LEGENDS

748 **Figure 1: H2A.Z is required for normal patterns of H3K27 methylation**

749 A) Genome browser images illustrate H3K27me<sub>2/3</sub> enrichment on *N. crassa* Linkage Group  
750 (“chromosome”) III for wild type,  $\Delta hH2Az$ , and  $\Delta set-7$ . A segment of chromosome III is  
751 displayed at higher resolution to illustrate depletion of internal H3K27me<sub>2/3</sub> domains.

752 B) H3K27me<sub>2/3</sub> in the  $\Delta hH2Az$  strain exhibits striking depletion of most H3K27me<sub>2/3</sub> domains,  
753 with overall lower enrichment of this modification. Heatmaps display 325 PRC2-target domains  
754 (rows) ordered by wild type enrichment for wild type,  $\Delta hH2Az$ , and  $\Delta set-7$  strains centered on  
755 the 5’ end of each domain + or – 1,000 bp for a total window size of 2000 bp.

756 C) Genome browser images illustrate H3K27me<sub>2/3</sub> enrichment on chromosome III for wild type,  
757  $\Delta hH2Az$ , and two ectopic complemented strains of  $\Delta hH2Az+hH2Az^{wt}$ , as well as the  $\Delta swr-1$   
758 strain. The segment of chromosome III is displayed at higher resolution to illustrate rescue by  
759 complementation and depletion of H3K27me<sub>2/3</sub> in  $\Delta swr-1$  background.

760 D) Heatmaps of H3K27me<sub>2/3</sub> rescue in complemented strains ( $\Delta hH2Az+hH2Az^{wt}$  [ACt9-3 and  
761 ACt12-1]) and depletion in the  $\Delta swr-1$  strain. The heatmaps are ordered as in B and depict the  
762 domain boundary + or – 1,000 bp for a total window size of 2,000bp.

763

764 **Figure 2: Deletion of *hH2Az* results in region-specific loss of H3K27me<sub>2/3</sub>**

765 A) Genome browser images illustrate H3K27me<sub>2/3</sub> enrichment on Linkage Group  
766 (“chromosome”) III for wild type,  $\Delta hH2Az$ ,  $\Delta cac-3$ , and  $\Delta set-7$ . The two segments of  
767 chromosome III are displayed at higher resolution to visualize region-specific loss. Left panel  
768 displays the end of the chromosome to ~300 kb (left panel) and from ~400-600 kb (right panel).

769 The telomere-proximal H3K27me2/3 regions are only moderately affected by the deletion of  
770 *hH2Az*, whereas internal domains show a more dramatic loss of H3K27me2/3.  
771 B) Heatmaps of H3K27me2/3 enrichment for wild type, *ΔhH2Az*, *Δcac-3*, and *Δset-7* across  
772 PRC2-target domains organized by their proximity to the telomere. The top section is restricted  
773 to domains that are <200 kb away from the chromosome ends (“telomere-proximal domains”),  
774 plotted from largest to smallest. The bottom of the heatmaps contain the domains that are >200  
775 kb away from chromosome ends (“internal domains”), also plotted from largest to smallest.  
776 Heatmaps are centered on the 5’ edge of all 325 PRC2-target domains + or –1,000 bp for a total  
777 window size of 2,000 bp. The *ΔhH2Az* strain retains most telomere-proximal H3K27me2/3, as  
778 opposed to the *Δcac-3* strain where almost all H3K27me2/3 enrichment is lost from telomere-  
779 proximal regions.

780

### 781 **Figure 3: H3K27me2/3 and H2A.Z are not colocalized in *N. crassa* mycelium**

782 A) Genome browser images of ChIP-seq for H2A.Z-GFP (green) and H3K27me2/3 (blue)  
783 enrichment across Linkage Group (“chromosome”) VII. A segment of chromosome VII is  
784 displayed at higher resolution to visualize the distinct patterns of each modification. Distinct  
785 peaks are located at the start of many genes in the genome yet few H2A.Z peaks are present  
786 within transcriptionally silent PRC2-target domains.

787 B) Heatmaps of H3K27me2/3 (blue) and H2A.Z-GFP (green) enrichment ordered by  
788 H3K27me2/3 enrichment. Heatmaps are centered on the transcription start site (TSS), + or –  
789 1,000 bp for a full window size of 2,000 bp.

790 C) Gene profile of H2A.Z-GFP (green line) and H3K27me2/3 (blue line) enrichment for all  
791 genes (fit to 1000 bp for gene body length) in the genome – 1,000 bp upstream of TSS and +  
792 1,000 bp downstream of TES.

793 D) Gene profile of H2A.Z-GFP (green line) and H3K27me2/3 (blue line) enrichment for only  
794 H3K27me2/3 enriched genes in the genome – 1,000 bp upstream of TSS and + 1,000 bp  
795 downstream of TES.

796 E) Line plot centered on 325 PRC2-target domains displays very low enrichment for H2A.Z-  
797 GFP (green line) and high enrichment for H3K27me2/3 (blue line).

798

799

800 **Figure 4: H2A.Z is important for the proper regulation of a large number of genes in *N.***

801 ***crassa*, including *eed***

802 A) Volcano plot of differentially expressed genes in  $\Delta hH2Az$ . Deletion of *hH2Az* misregulates a  
803 large number of genes in both directions; however, there are slightly more genes that are  
804 upregulated upon deletion of *hH2Az*. H2A.Z is necessary for the proper expression of a large  
805 percentage of genes in *N. crassa*. All members of the PRC2 complex are labeled with text boxes  
806 on the plot. Genes enriched for H3K27me2/3 are different shades of pink corresponding to their  
807 significance values. The *eed* gene is significantly downregulated in the deletion strain.

808 B) Genome browser images of each gene and its corresponding H2A.Z enrichment, for all PRC2  
809 components, there is enrichment of H2A.Z near the TSS. Boxplots of normalized transcript  
810 counts for all subunits of PRC2 (*eed* [light blue], *set-7* [purple], *suz-12* [pink] *cac-3* [dark blue])  
811 in wild type,  $\Delta hH2Az$ ,  $\Delta set-7$ , and  $\Delta hH2Az;\Delta set-7$  backgrounds. Downregulation of *eed* is  
812 dependent on *hH2Az* deletion.

813

814 **Figure 5: Overexpression of *eed* rescues H3K27 methylation levels in the absence of H2A.Z**

815 A) Partial restoration of H3K27 methylation throughout the genome in a  $\Delta hH2Az; \Delta eed$  strain  
816 containing *his-3::Pccg-1-3xFlag-eed* and overexpressing *eed* at ~100x the native level. Most  
817 H3K27 methylation is restored, though there are some qualitative differences in the peak patterns  
818 between the overexpression strain and wild type.

819 B) Heatmaps of H3K27me3 enrichment across 325 PRC2-target domains sorted by size (largest  
820 to smallest) centered on each domain + or - 3,000 bp for a full window size of 6,000 bp for wild  
821 type,  $\Delta hH2Az$ ,  $\Delta eed; his-3::Pccg-1-3xflag-eed$ , and  $\Delta eed; \Delta hH2Az; his-3::Pccg-1-3xflag-eed$ . Not  
822 all domains are fully rescued to wild type levels.

823

824 SUPPLEMENTAL FIGURE LEGENDS

825 **Figure S1:  $\Delta hH2Az$  replicates demonstrating depletion of H3K27me2/3**

826 Genome browser images of two wild type progeny (top two tracks), and initial four backcrossed  
827 sibling *hH2Az* deletion strains on chromosome V. Segment shown at higher resolution to  
828 visualize loss of H3K27me2/3.

829

830 **Figure S2:  $\Delta hH2Az$  exhibits a slow growth phenotype and is hypersensitive to MMS**

831 A) MMS Spot test with increasing concentrations of MMS (5 and 10x more *hH2Az* (S532)  
832 conidia was used for growth comparable to wild type on sorbose) and decreasing concentrations  
833 of conidia.

834 B) Linear growth rate from race tubes from  $\Delta hH2Az + hH2Az^{wt}$  (ACt9-3),  $\Delta swr-1$ ,  $\Delta hH2Az$   
835 (S532), and wild type in triplicate.



836 C) Image of race tubes growing strain in (B) in triplicate.

837

838 **Figure S3: Southern Blot confirming ectopic integration of *hH2Az* gene fragment into *N.***

839 *crassa*

840 A) Southern blot of wild type,  $\Delta hH2Az$ , and two ectopic complemented strains

841 ( $\Delta hH2Az+hH2Az^{wt}$ ). Distinct bands in wild type (left arrow) and  $\Delta hH2Az$ . Band corresponding

842 to  $\Delta hH2Az$  and larger band seen in ectopic complemented strains (right arrows). *hH2A.z*

843 integration was also confirmed by PCR.

844 B) FLAG western blot displaying the same expression level of 3xFLAG-EED in both  $\Delta eed$  and

845  $\Delta eed;\Delta hH2Az$  background. 3xFLAG-EED indicated by black arrow (expected size 77.5kD).

846

847 **Figure S4: Increasing *N. crassa* H2A.Z antibody concentration improves ChIP-seq**

848 **resolution**

849 A) Genome browser image of increasing amount of H2A.Z antibody (1  $\mu$ L, 2.5  $\mu$ L, 5  $\mu$ L).

850 B) H2A.Z antibody ChIPs in wild type with increasing amounts of H2A.Z antibody. 5  $\mu$ L is the

851 optimal amount of the H2A.Z antibody to use for the highest resolution of H2A.Z enriched

852 regions.

853

854 **Figure S5: Correlation matrix for ChIP-seq replicates**

855 Spearman correlation matrix for ChIP-seq replicates used in this study

856

857 SUPPLEMENTAL TABLES

858 **Table S1: Strains used in this study**

- 859 **Table S2: H3K27me2/3 domains determined with HOMER for wild type**
- 860 **Table S3: H3K27me2/3 domains determined with HOMER for  $\Delta hH2A_z$**
- 861 **Table S4: H3K27me2/3 domains in common between  $\Delta hH2A_z$  and wild type**
- 862 **Table S5: Oligonucleotides used in this study**
- 863 **Table S6: Misregulated genes in  $\Delta hH2A_z$**

Figure 1

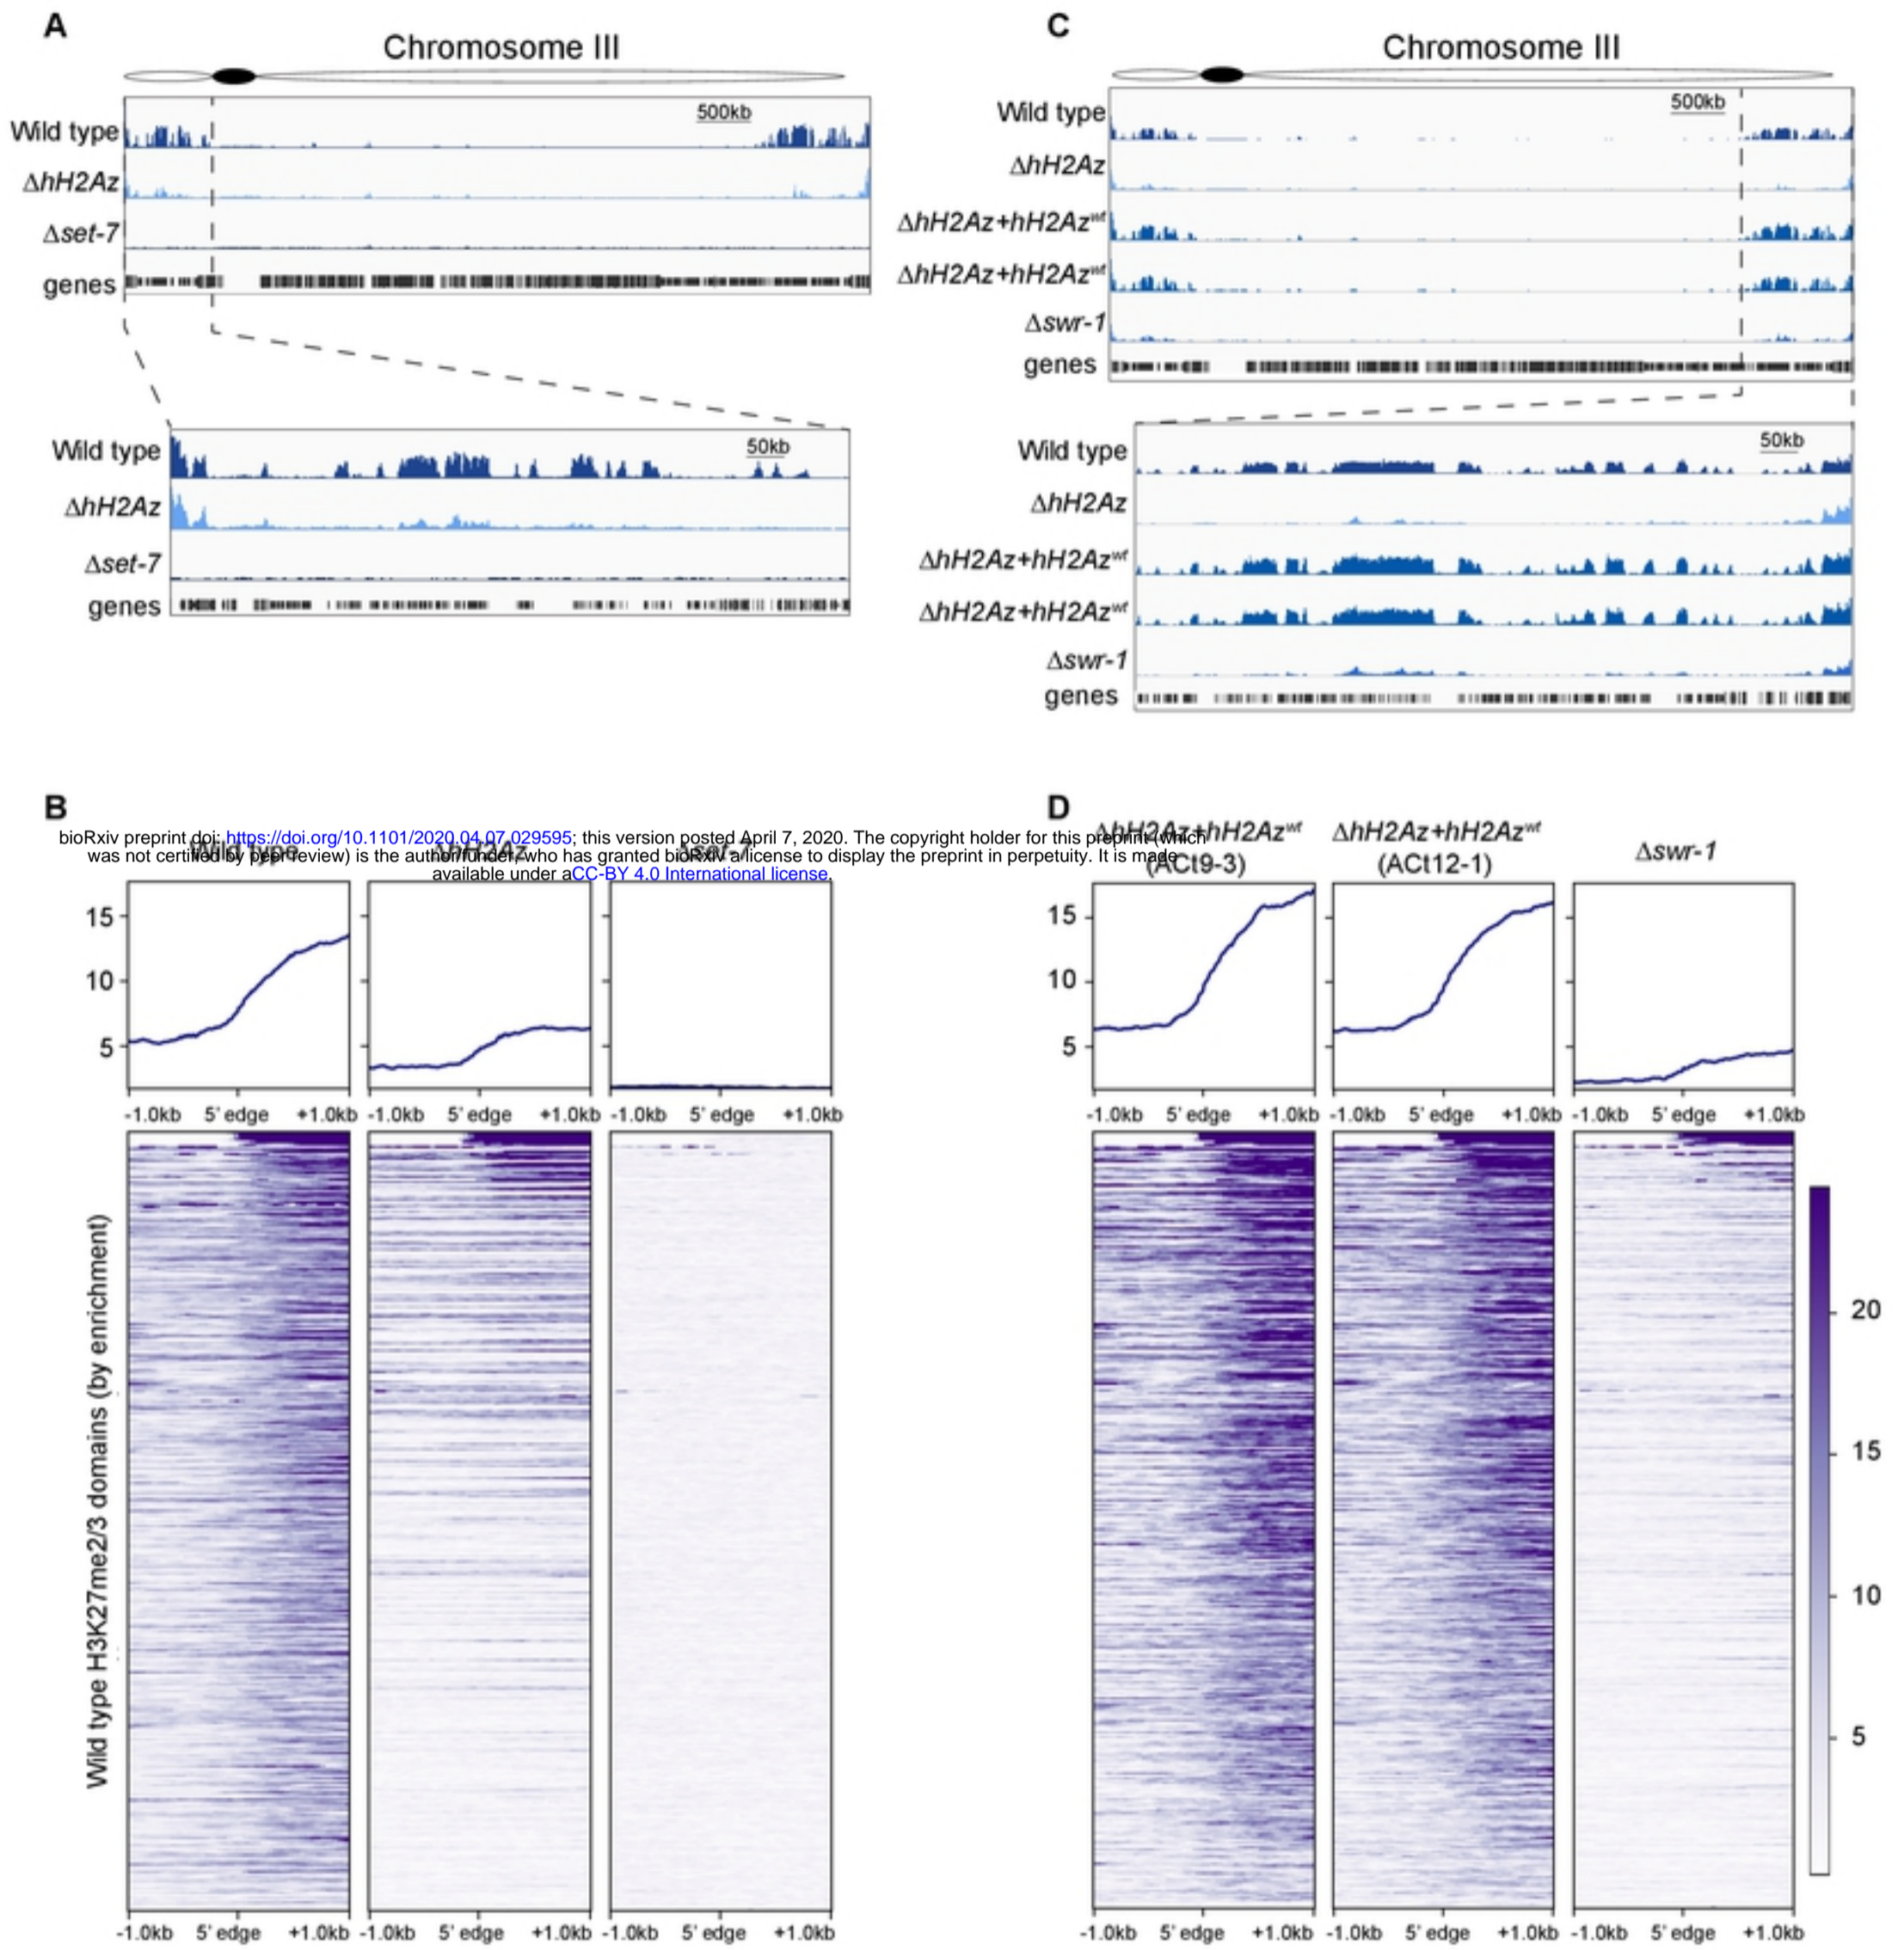

Figure 2

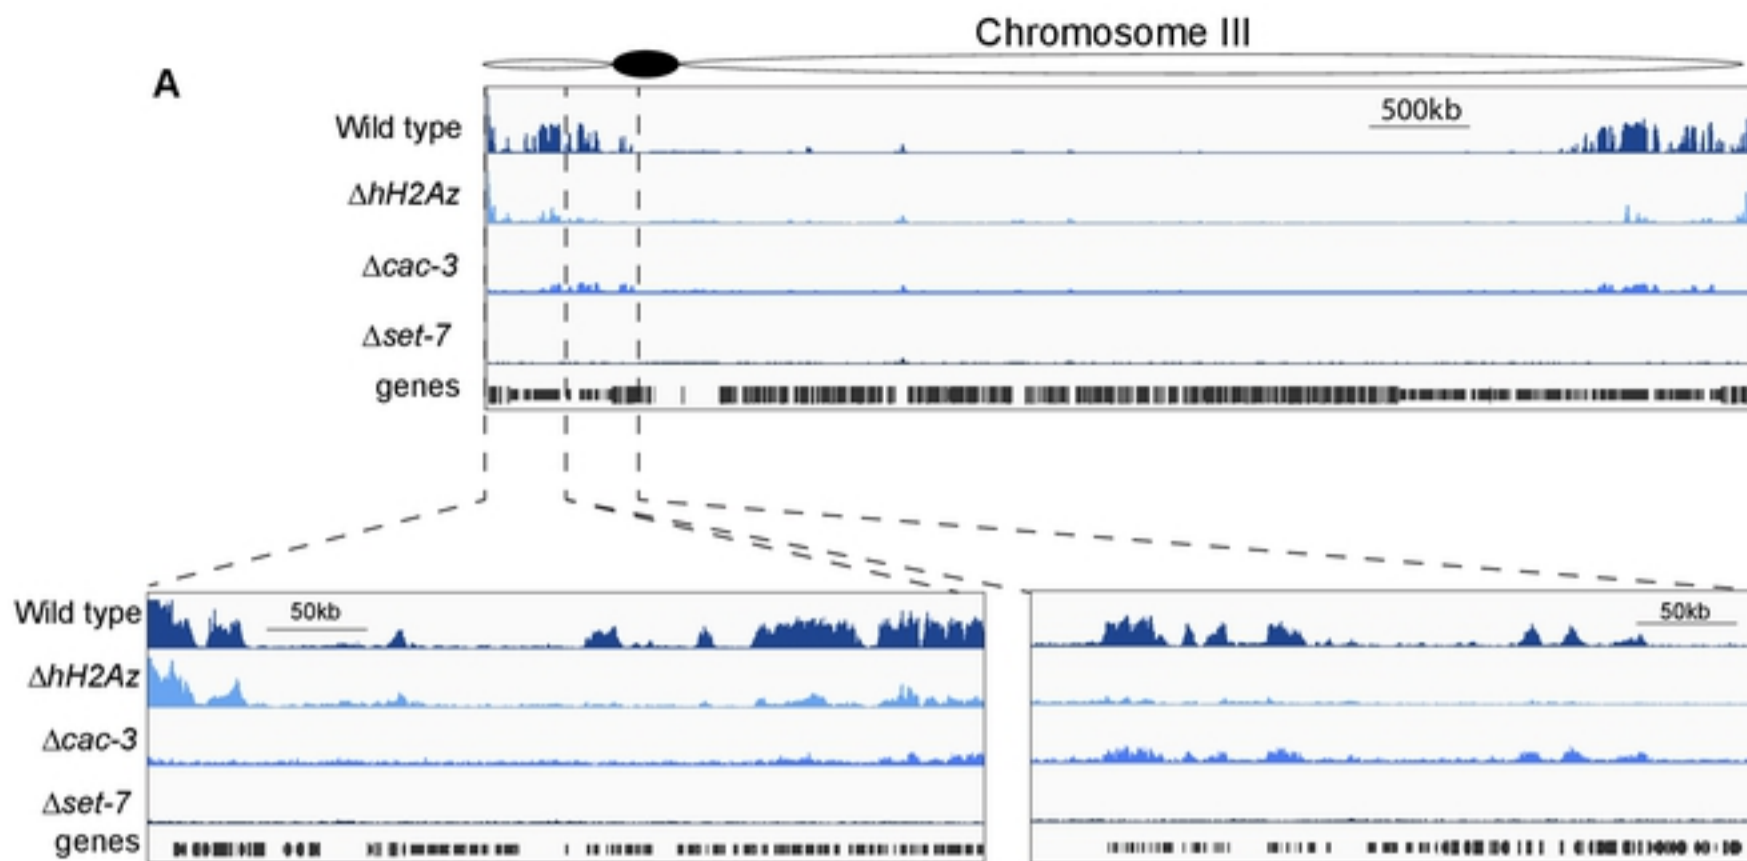

bioRxiv preprint doi: <https://doi.org/10.1101/2020.04.07.029595>; this version posted April 7, 2020. The copyright holder for this preprint (which was not certified by peer review) is the author/funder, who has granted bioRxiv a license to display the preprint in perpetuity. It is made available under aCC-BY 4.0 International license.

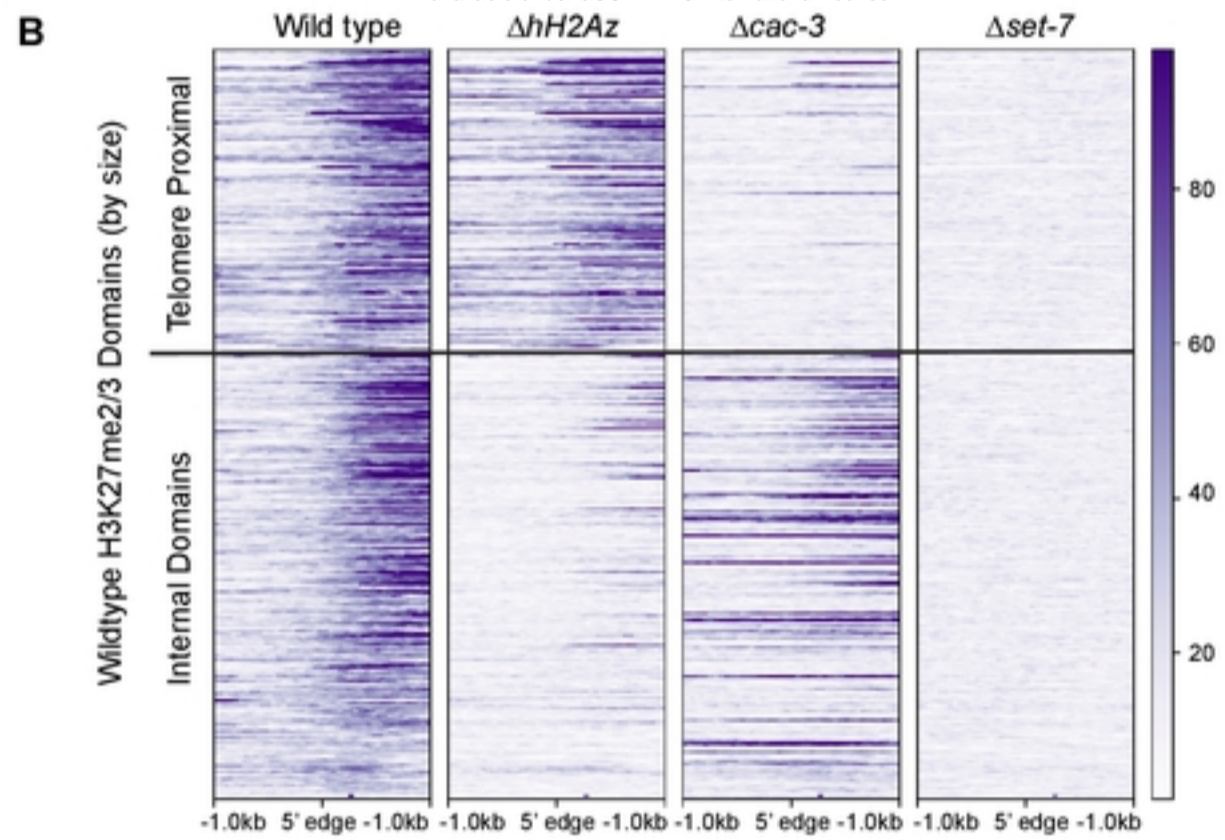

Figure 3

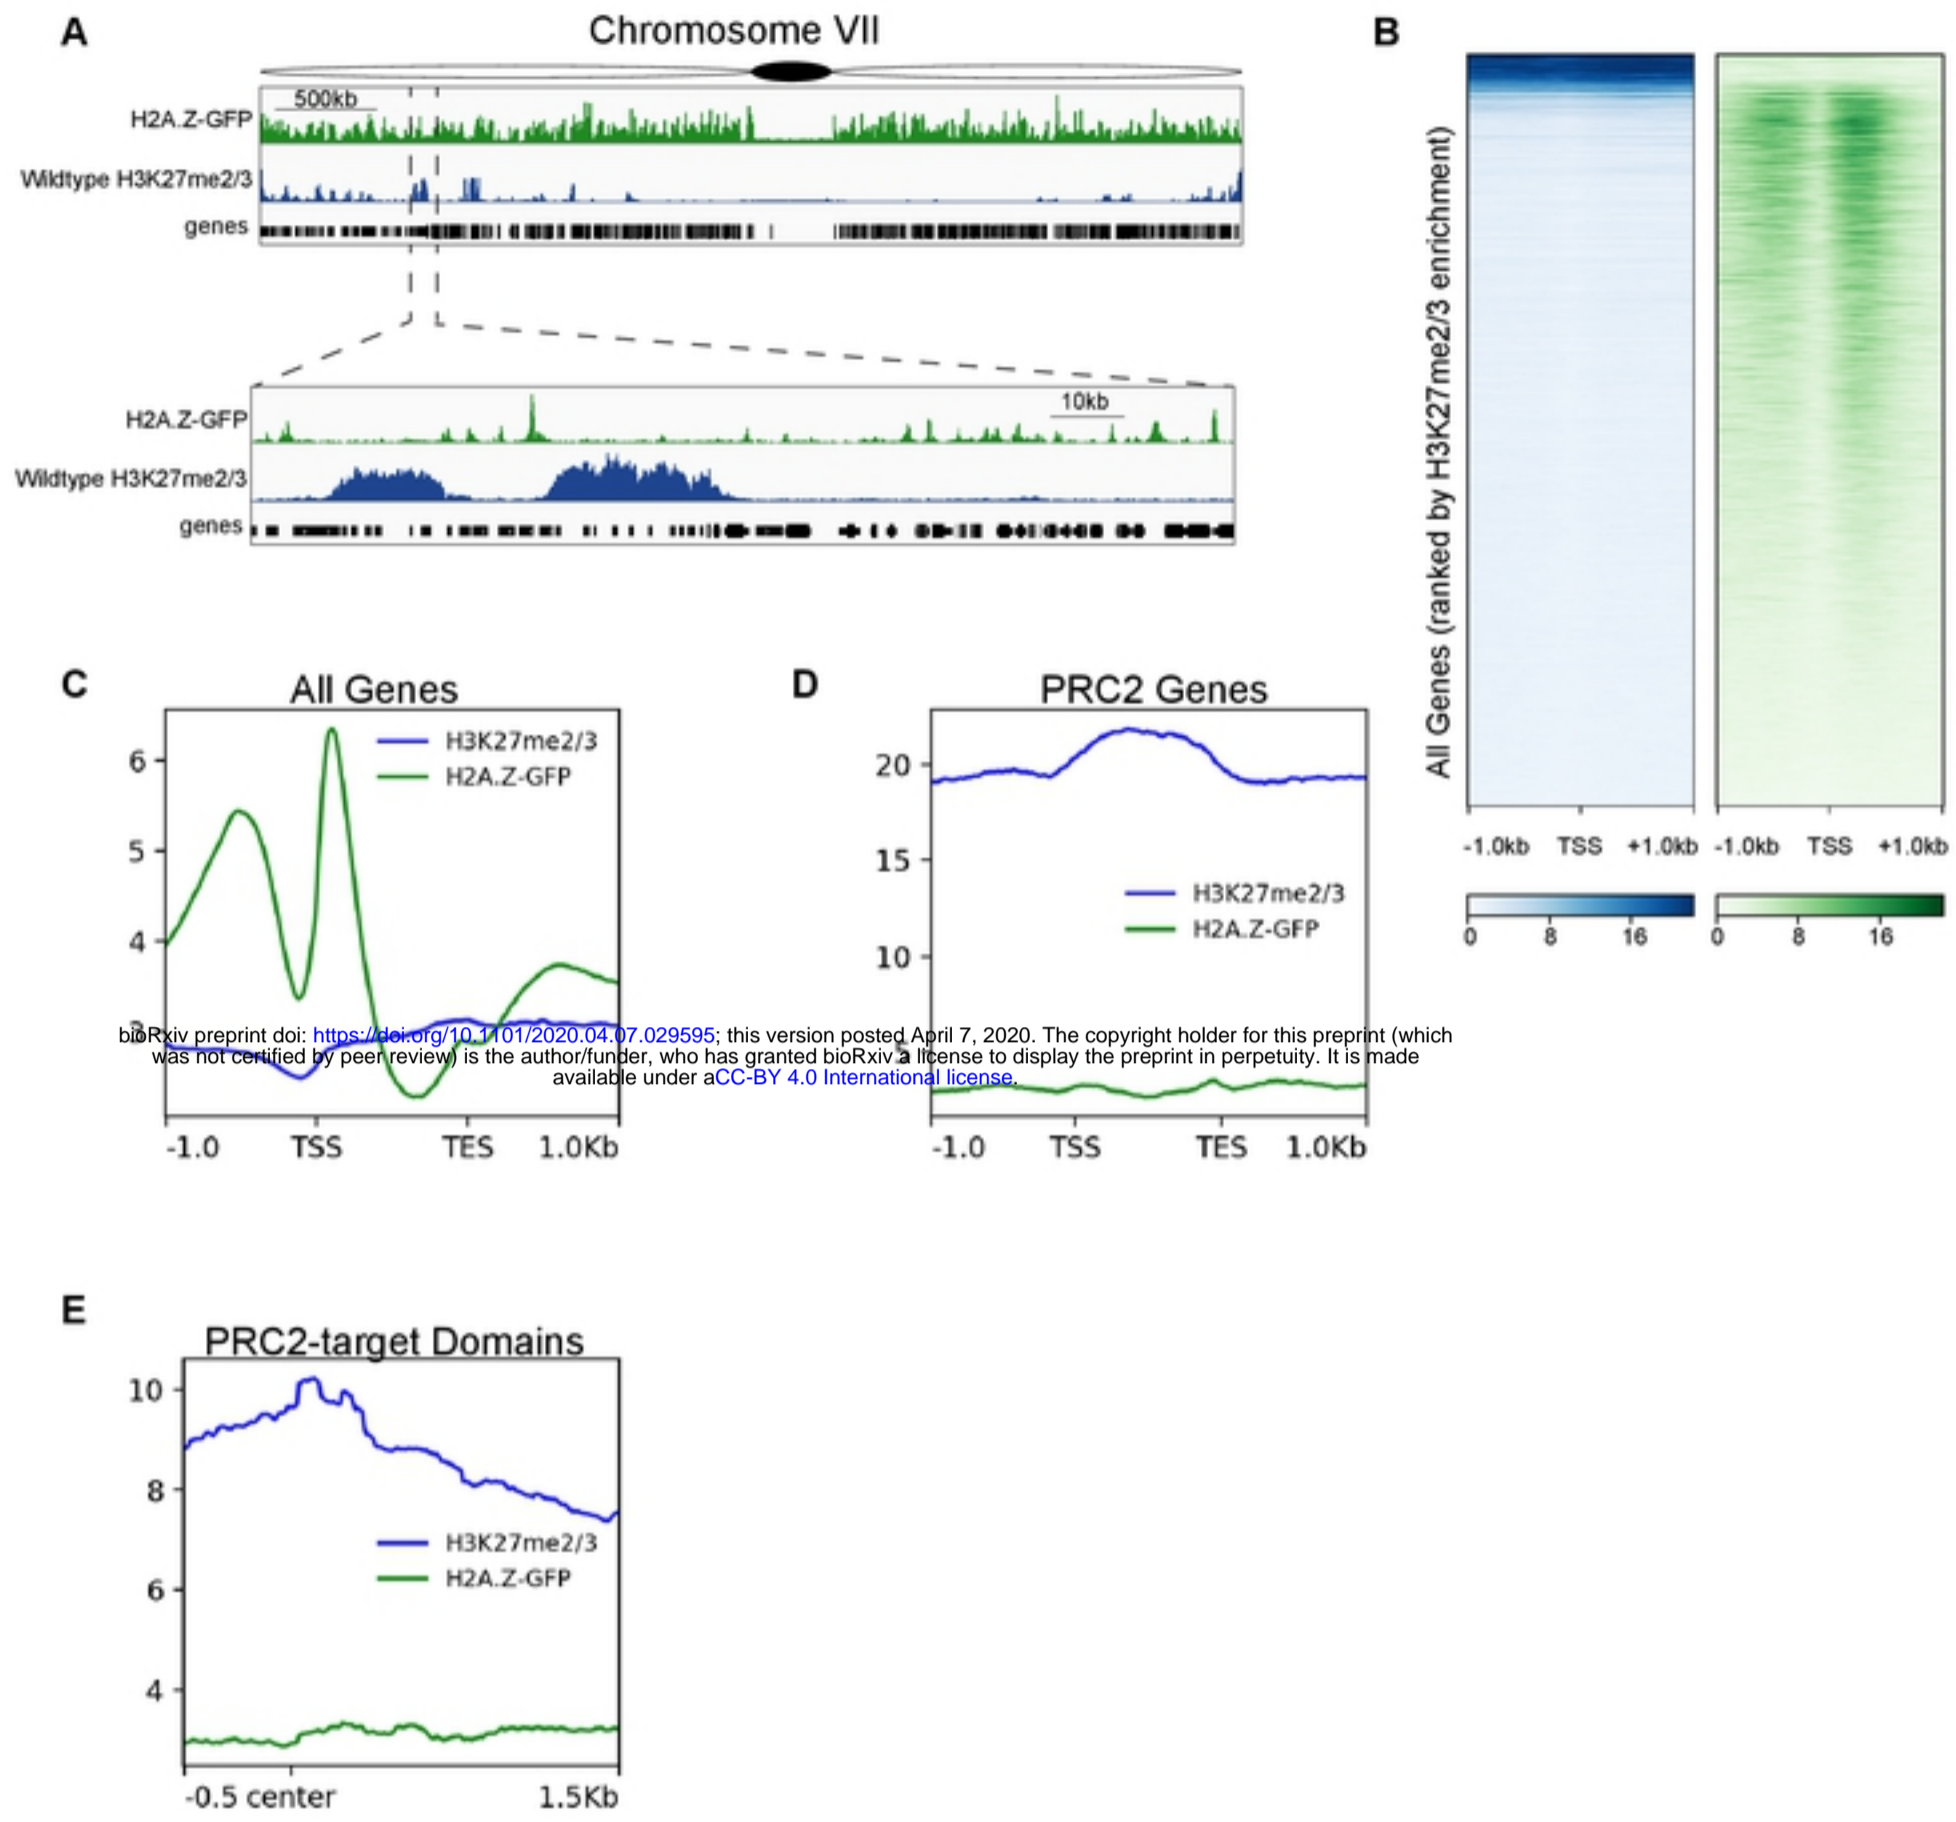

Figure 4

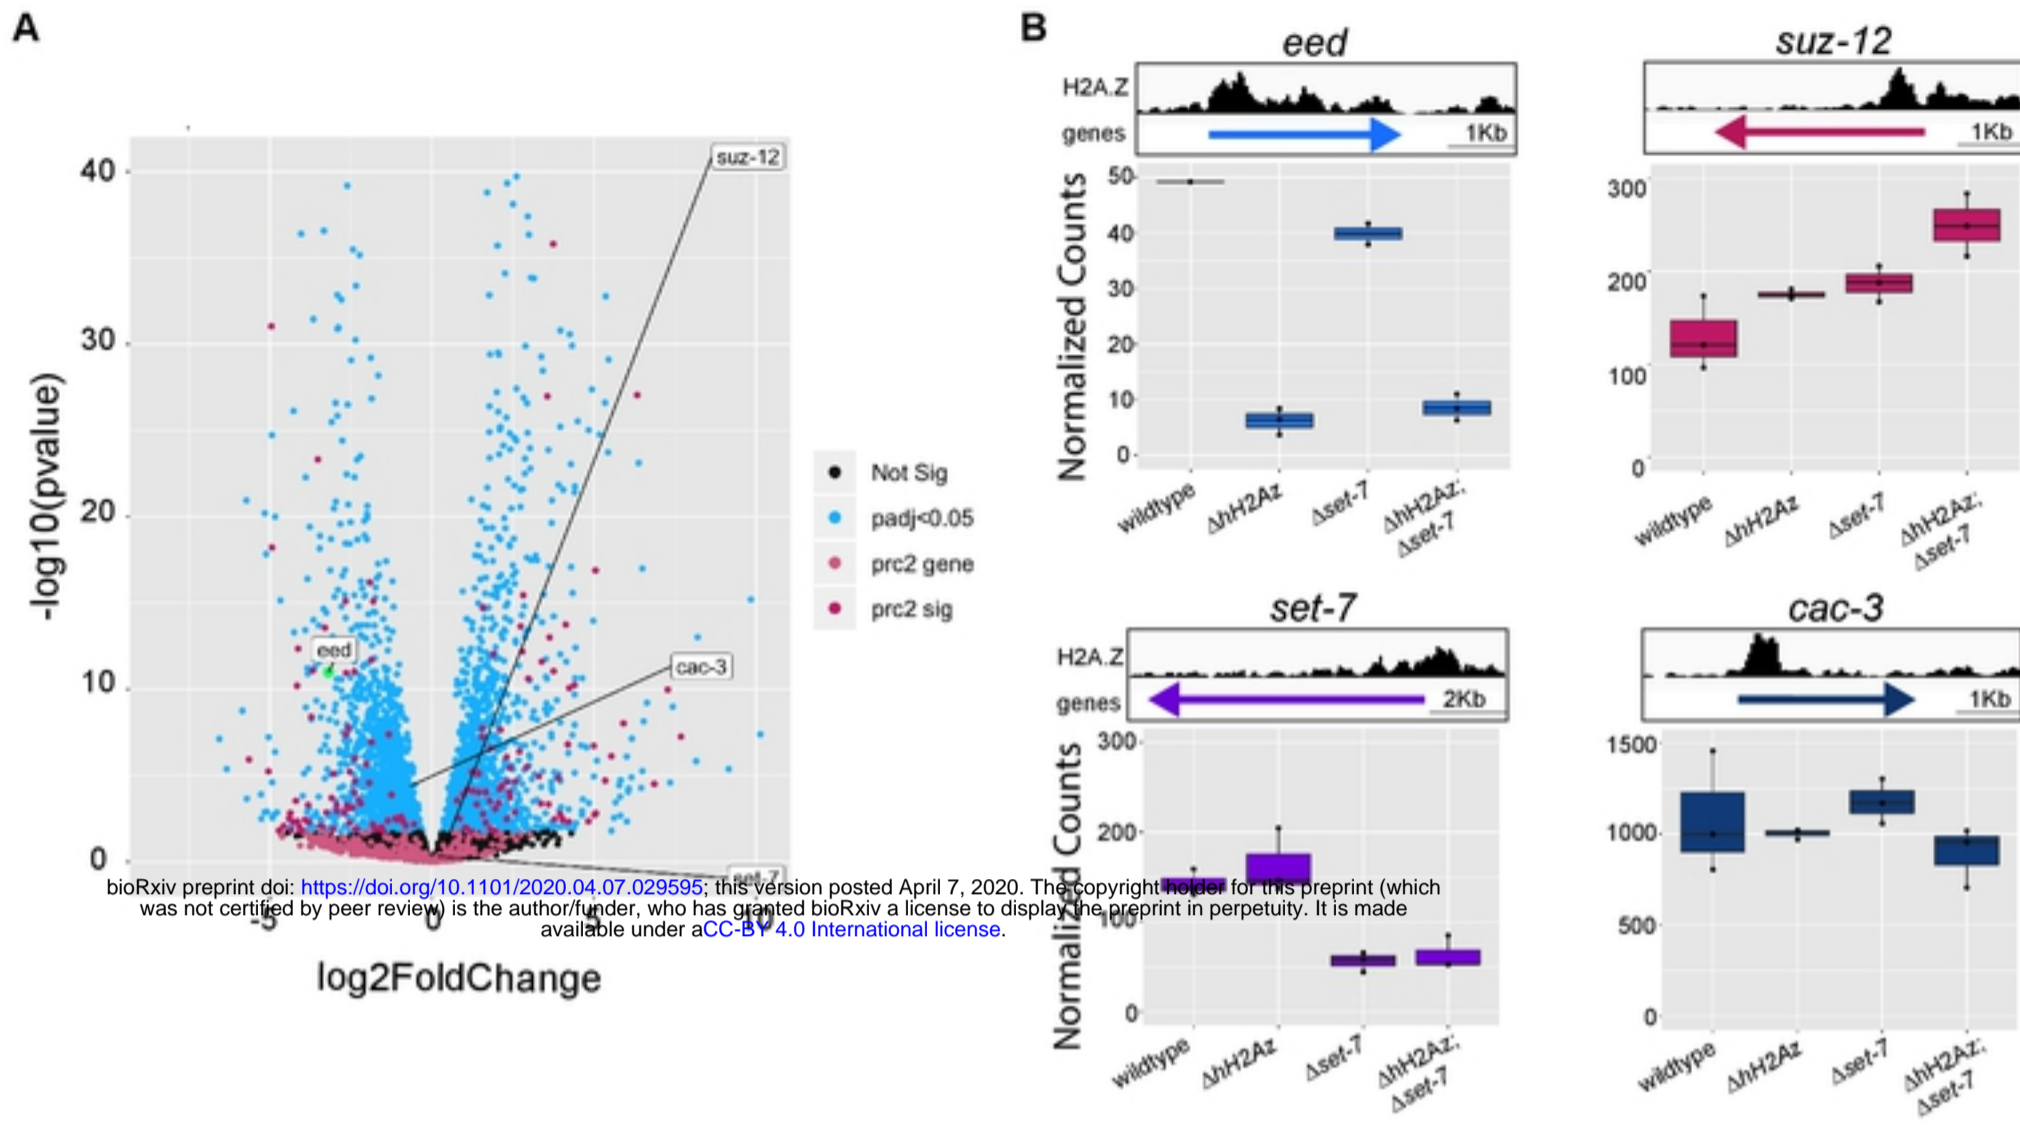

Figure 5

A

Chromosome VI

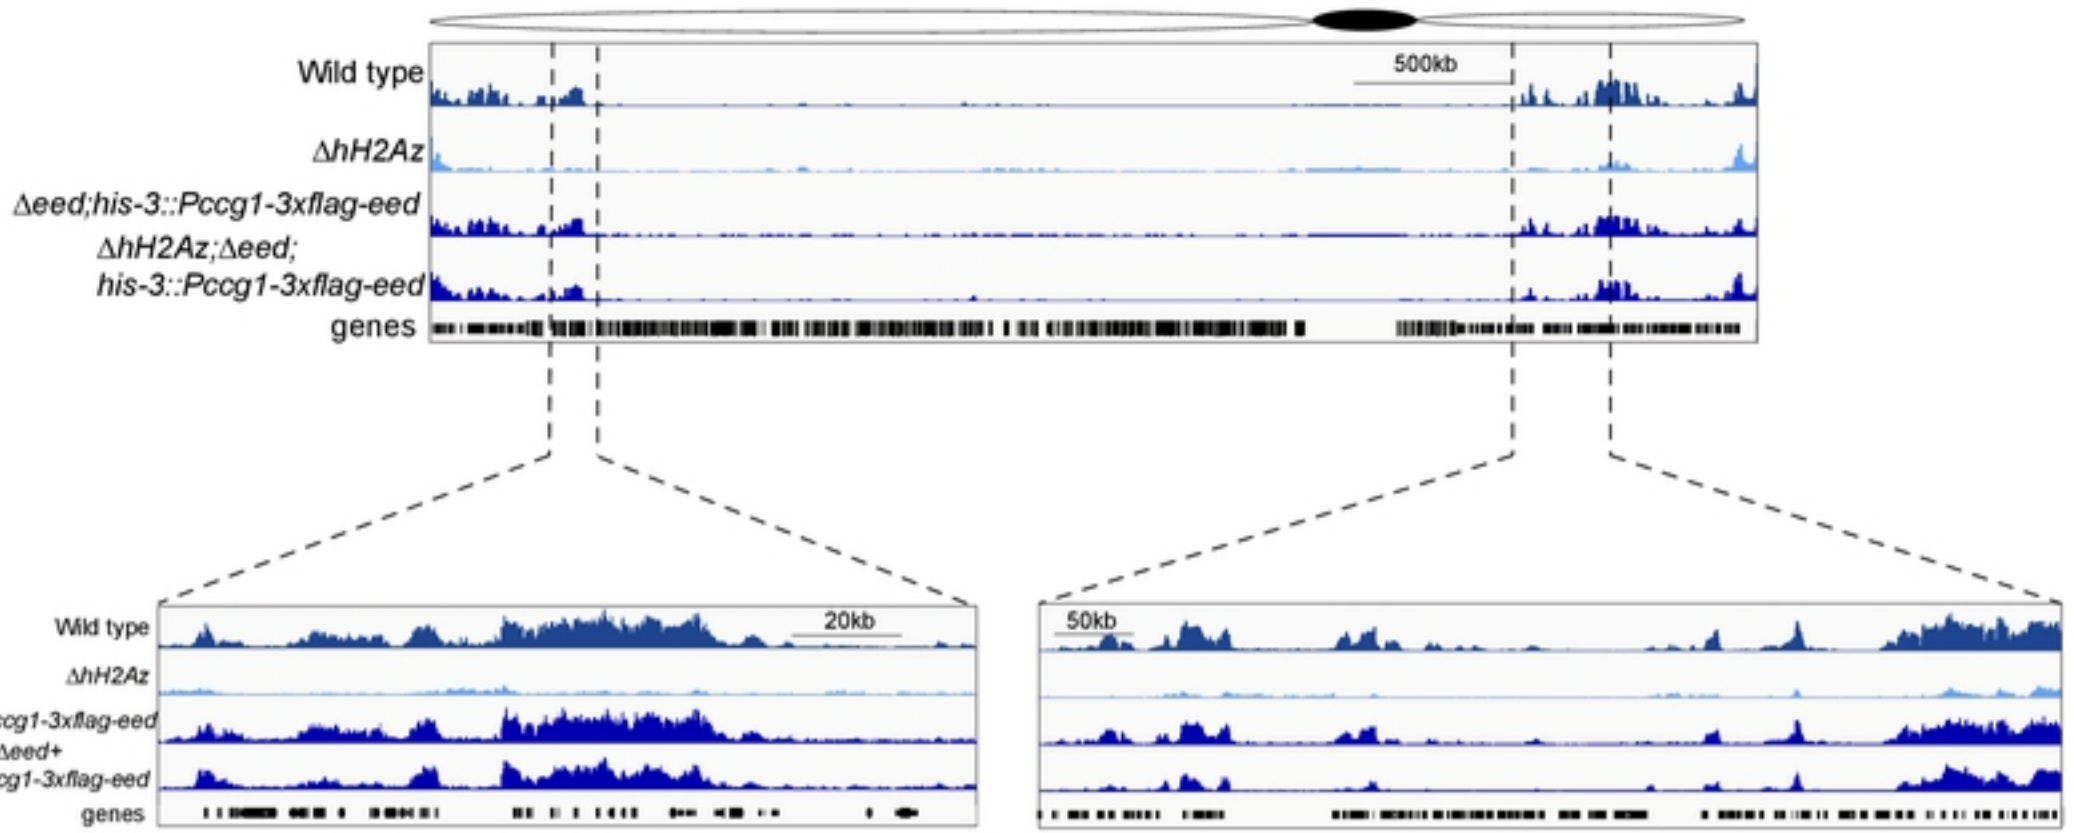

bioRxiv preprint doi: <https://doi.org/10.1101/2020.04.07.029595>; this version posted April 7, 2020. The copyright holder for this preprint (which was not certified by peer review) is the author/funder, who has granted bioRxiv a license to display the preprint in perpetuity. It is made available under aCC-BY 4.0 International license.

B

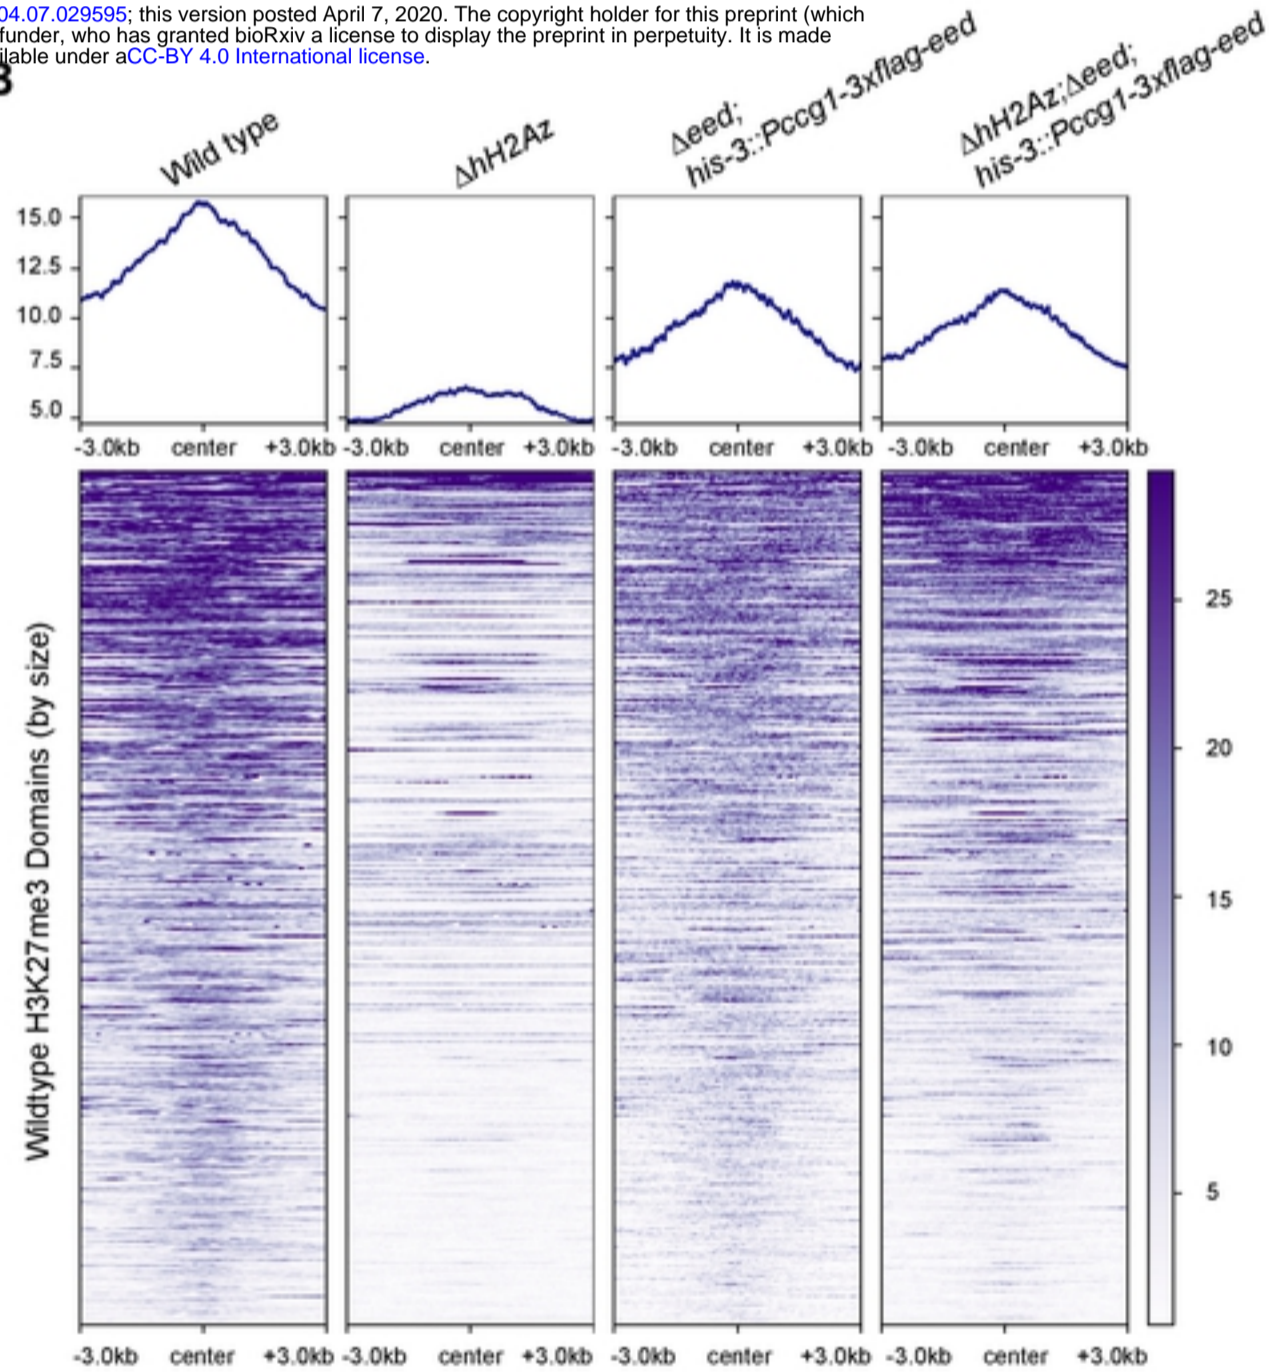

Source: https://www.biorxiv.org/content/biorxiv/early/2020/04/07/2020.04.07.029595.full.pdf
